## Review Article

# Regulation of cardiac function by cAMP nanodomains

Milda Folkmanaitė and  Manuela Zaccolo

Department of Physiology, Anatomy and Genetics, University of Oxford, U.K.

**Correspondence:** Manuela Zaccolo ([manuela.zaccolo@balliol.ox.ac.uk](mailto:manuela.zaccolo@balliol.ox.ac.uk))

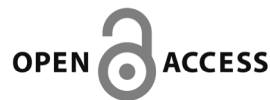

Cyclic adenosine monophosphate (cAMP) is a diffusible intracellular second messenger that plays a key role in the regulation of cardiac function. In response to the release of catecholamines from sympathetic terminals, cAMP modulates heart rate and the strength of contraction and ease of relaxation of each heartbeat. At the same time, cAMP is involved in the response to a multitude of other hormones and neurotransmitters. A sophisticated network of regulatory mechanisms controls the temporal and spatial propagation of cAMP, resulting in the generation of signaling nanodomains that enable the second messenger to match each extracellular stimulus with the appropriate cellular response. Multiple proteins contribute to this spatiotemporal regulation, including the cAMP-hydrolyzing phosphodiesterases (PDEs). By breaking down cAMP to a different extent at different locations, these enzymes generate subcellular cAMP gradients. As a result, only a subset of the downstream effectors is activated and a specific response is executed. Dysregulation of cAMP compartmentalization has been observed in cardiovascular diseases, highlighting the importance of appropriate control of local cAMP signaling. Current research is unveiling the molecular organization underpinning cAMP compartmentalization, providing original insight into the physiology of cardiac myocytes and the alteration associated with disease, with the potential to uncover novel therapeutic targets. Here, we present an overview of the mechanisms that are currently understood to be involved in generating cAMP nanodomains and we highlight the questions that remain to be answered.

Properly executed cardiac contraction and relaxation are essential for maintaining the normal function of the heart. Sympathetic stimulation and catecholamines release prompted under stress conditions (e.g. during physical or emotional strain) modulate cardiac activity via G-protein coupled receptor (GPCR) signaling. Catecholamines activate  $\beta$  adrenergic receptors ( $\beta$ AR), a subfamily of GPCRs, leading to synthesis of cyclic adenosine monophosphate (cAMP) by adenylyl cyclases (AC) and modulation of heart rate (chronotropy), relaxation (lusitropy), and contraction force (inotropy). The signal is then terminated by phosphodiesterases (PDEs) that degrade cAMP to adenosine monophosphate [1–3]. Different types of GPCRs elicit distinct effects: activation of  $G_s$ -coupled receptors leads to increased AC activity, whereas activation of  $G_i$ -coupled receptors inhibits cAMP synthesis by AC [4,5]. Each individual cell can express up to hundreds of different  $G_s$ - or  $G_i$ -coupled receptors [6] that, in response to a variety of hormones and other extracellular signals, lead to changes in cAMP. Each receptor elicits a response that is appropriate to the specific activating extracellular stimulus, despite all these receptors operating via changes in the level of the same second messenger, cAMP.

## cAMP pathway compartmentation Compartmentation of protein components

cAMP, a ubiquitous second messenger produced in response to the GPCR signaling, modulates cardiac contraction and relaxation, as well as multiple other biological responses such as gene expression and regulation of metabolic pathways [7]. cAMP can act through four known effector protein groups: protein

Received: 13 December 2022  
 Revised: 29 January 2023  
 Accepted: 07 February 2023

Accepted Manuscript online:  
 07 February 2023  
 Version of Record published:  
 27 February 2023

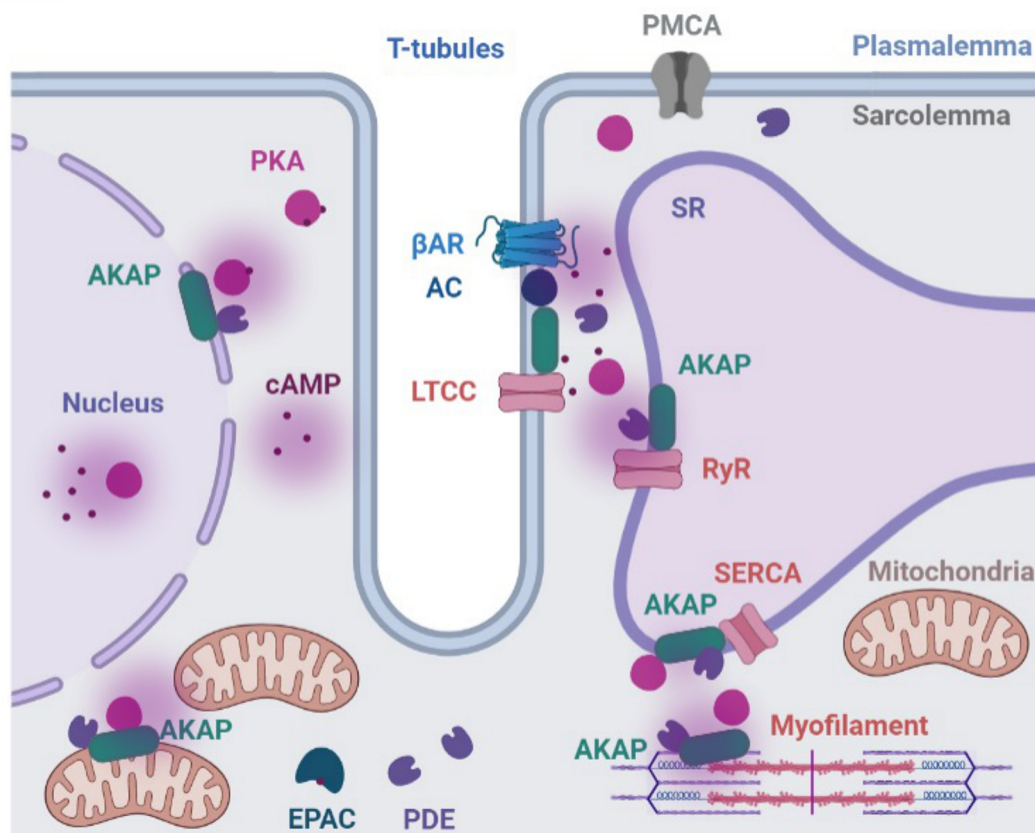

**Figure 1. Different cAMP nanodomains execute  $\beta$ AR signaling in cardiomyocytes**

When  $\beta$ ARs are activated, ACs produce cAMP, which diffuses throughout the cytosol. Different cAMP nanodomains help to ensure cAMP signaling specificity. PDEs and AKAPs are two important components of cAMP nanodomains. PDEs degrade cAMP, helping to form cAMP gradients within the cell. AKAPs anchor PKA, a key cAMP effector protein, to specific locations within the cell. Both PDEs and AKAPs have multiple isoforms with varying enzymatic activity, localization, and expression levels. The presence of multiple cAMP signaling components helps ensure that the correct cellular effects are achieved upon  $\beta$ AR activation. Abbreviations: AC, adenylyl cyclase; AKAP: A-kinase anchoring protein;  $\beta$ AR,  $\beta$  adrenergic receptor; EPAC, exchange protein directly activated by cAMP; PDE, phosphodiesterase; PKA, protein kinase A; PMCA, plasma membrane calcium ATPase; LTCC, L-type calcium channel; RyR, Ryanodine channel; SERCA, SR calcium ATP-ase, SR, sarcoplasmic reticulum.

kinase A (PKA), exchange protein-activated by cAMP (EPAC), cyclic nucleotide-gated channels (CNGC), and Pop-eye domain-containing (POPDC) proteins. To enable hormonal specificity, cAMP signals and the activity of its effectors are compartmentalized in the cell (Figure 1) [8–12]. The spatial and temporal regulation of cAMP signaling was first hypothesized when it was observed that stimulation of GPCR with isoproterenol, a  $\beta$ AR activator, or with prostaglandin induces different effects despite generating similar levels of cAMP:  $\beta$ AR stimulation promotes cardiac inotropy and lusitropy while activation of the prostaglandin receptor does not [13]. Such hormonal specificity was then shown to rely on  $\beta$ AR stimulation predominantly activating a subset of type II isoforms of PKA, while prostaglandin mostly activates type I PKA [14]. The heart expresses different types of  $\beta$ AR, including  $\beta$ 1,  $\beta$ 2, and  $\beta$ 3AR that induce distinct effects. For example, activation of  $\beta$ 1AR, a predominant isoform in the heart, increases heart rate and cardiac contractility, but its chronic stimulation can lead to cardiac remodeling and heart failure.  $\beta$ 2AR signaling also regulates rate and contractility but it can also activate nonclassical signaling pathways, and its effects are more localized than  $\beta$ 1 and its activation is cardioprotective [15].  $\beta$ 3AR receptors appear to mediate negative inotropic effects in mice cardiomyocytes [16,17]. Different PKA types are anchored to distinct PKA-anchoring proteins (AKAPs). Selective activation of restricted subsets of anchored PKA is then achieved via generation of subcellular cAMP gradients, resulting in phosphorylation of different protein targets. Several other studies provide additional support to spatial confinement being essential for achieving hormonal signaling specificity and accurate execution of cellular functions [11,18–22].

Multiple factors contribute to signal compartmentalization, including distinctive signaling via multiple GPCRs, involvement of different PDE isoforms, AKAPs, phosphatases (PP), ACs, and types of effector proteins such as PKA and EPAC. For example, activation of  $\beta$ 1-ARs, but not  $\beta$ 2-ARs, leads to phosphorylation of phospholamban (PLN) [23,24]. This can be attributed to differential localization of the receptors, as  $\beta$ 2-ARs localize predominantly to the T tubules, whereas  $\beta$ 1-ARs can be found across the entire cell membrane and generate a more diffuse cAMP response. Signaling through distinct AC isoforms also elicits specific effects, likely due to differential localization of AC isoforms. For example, disruption of AC5 signaling has been demonstrated to be cardioprotective, whereas AC6 knock-out results in increased mortality upon  $\beta$ -AR stimulation-induced cardiomyopathy [25,26]. AKAPs ensure signaling specificity by anchoring PKA to intracellular sites, thereby confining phosphorylation signals to specific targets. AKAPs promote signaling specificity also by binding a different array of cAMP signaling-associated proteins, thus generating localized signaling hubs, or signalosomes. The association of the various signaling components with the AKAP may have different effects. For example, specific AKAP-AC interactions promote cAMP generation and PKA signaling, whereas AKAP interaction with other AC inhibits the cyclase activity [27]. Overall, specific protein–protein interactions involving pathway components, in combination with mechanisms of restricted diffusion and buffering of cAMP, contribute to the formation of local cAMP gradients and signal compartmentation [28].

PDEs, the cAMP-degrading enzymes, play a key role in the control of cAMP compartmentation. PDEs belong to a superfamily of enzymes including 11 families (PDE1–11) and over 100 estimated isoforms [29]. Different PDE isoforms have distinct localization, allosteric modulation, substrate specificity (for cAMP and/or cGMP) and enzymatic kinetics. These different features contribute to the ability of individual PDE isoforms, or a specific combination of PDE isoforms, to establish cAMP nanodomains where the local cAMP concentration is differentially regulated from neighboring domains. Investigations on the role of PDEs on cAMP signaling in the heart suggest that PDE control might not be static, but rather change depending on activation of different signaling pathways. For example, it appears that PDE4 inhibition does not influence troponin I (TnI) phosphorylation in resting rat cardiac myocytes, while PDE4 is reportedly the main PDE that regulates cAMP levels at the TnI cAMP nanodomain upon  $\beta$ AR stimulation [30]. It is unclear, however, if these results translate to human as PDE4 expression is significantly lower in human than in rodent hearts [31].

A significant advancement in our understanding of cAMP regulation in the heart has been enabled by the use of genetically encoded fluorescence energy transfer (FRET)-based biosensors. Targeting these sensors to subcellular sites and acquiring live cell, real-time data with high spatiotemporal resolution have allowed direct observation of cAMP compartmentation and dissection of important details of signal regulation. Targeted FRET sensors have been useful in highlighting the importance of PDEs in forming distinct subcellular cAMP-signaling domains. For example, cAMP FRET sensors targeted to different subcellular sites revealed that cAMP levels following  $\beta$ AR stimulation are significantly lower at the myofilament than at other sites, including the sarcoplasmic reticulum (SR) and the plasmalemma in rat cardiomyocytes [32]. Interestingly, the differences in local signaling were abolished after PDE inhibition, highlighting the importance of PDE in the control of local cAMP signals. Several other studies report the central role of PDEs in establishing cAMP compartmentation [33–35]. FRET sensors have also been instrumental in determining the size of the cAMP-signaling domains elicited by different PDEs. Using FRET sensors where a linker of varying length was introduced between the sensor and the catalytic domain of a PDEs, it was shown that different PDEs form cAMP domains of different sizes, e.g. the catalytic domain of PDE2A3 enzymes created a 30-nM nanodomain with low cAMP, whereas the catalytic domain of PDE4A1 generated a domain less than 10 nm in diameter in HEK293 cells [36]. A recent study used a similar approach to demonstrate that activation of GLP-1 receptors generates a pool of high cAMP that extends up to 60 nm in diameter around the receptor [37]. Spatially restricted cAMP generation upon GPCR stimulation would permit precise activation of downstream pathways and signaling cascades that are associated specifically with that specific receptor, avoiding cross-activation. Domains with similar nanometer size were observed at different subcellular sites including myofilament, SR, and sarcolemma [28,32,38].

## Compartmentation of cAMP

For the cell to be able to manage locally controlled cAMP nanodomains, the production, degradation, and propagation of cAMP must be precisely regulated. How this is executed remains to be fully elucidated. Estimates of intracellular cAMP diffusion coefficient range from 10 to 780  $\mu\text{m}^2/\text{s}$ , depending on cell type and experimental conditions [39,40]. Using experimentally established values, computational diffusion models indicate that PDEs alone cannot explain cAMP compartmentation as PDEs have relatively low catalytic rates that seem inadequate to effectively restrict the highly diffusible cAMP [40]. Even when taking into account that the activation threshold of PKA *in vivo* may be more than 20-fold higher than previously established *in vitro* [41], the activity of the PDEs alone would still appear

inadequate to create functionally meaningful cAMP gradients that can selectively activate only a subset of anchored PKA. This view could change if the PDE enzyme kinetics in the cell were also significantly different from those measured *in vitro*, as described for PKA. However, this remains to be established.

Mathematical models that integrate our current knowledge on PDE activity suggest that these enzymes could generate gradients of cAMP if the diffusion coefficient of the second messenger was significantly reduced [40]. Factors that could slow down cAMP diffusion in the cell include physical barriers and cAMP buffering. The expression of cAMP-binding proteins has traditionally been thought to be limited, making cAMP buffering an unlikely mechanism to influence cAMP dynamics. However, a significant molar excess of PKA regulatory subunits compared with catalytic subunits (average ~17-fold) has been reported, which could potentially provide substantial cAMP buffering [42].

In support of significant intracellular-buffering capacity, a recent study reports that, at low concentrations, a fluorescent cAMP analog diffuses extremely slowly at 0–10  $\mu\text{m}^2/\text{s}$  within the cell while its diffusivity increases to 10–100  $\mu\text{m}^2/\text{s}$  [36] when the cAMP concentration is increased by AC activation and PDE inhibition in HEK293 cells. Lack of diffusion at low cAMP concentration suggests that a number of cellular cAMP-binding sites exist that may enable the formation of cAMP nanodomains. Hydrolysis of cAMP by PDEs, together with intracellular cAMP buffering, could explain how cAMP signaling is compartmentalized in cells, although further investigations are warranted to determine the amount of non-PDE-based buffering needed for the cell to be able to maintain cAMP nanodomains.

A novel mechanism for how cAMP buffering could be executed in the cell has been recently reported by Zhang et al. The study shows that PKA regulatory subunits type I $\alpha$  (RI $\alpha$ ) undergoes liquid–liquid phase separation (LLPS) in the cytosol to form biomolecular condensates in various cell types, including cardiomyocytes [43]. Protein LLPS is a process where proteins self-assemble into liquid droplets that function as membraneless organelles, enabling the cell to optimize reaction kinetics, buffer molecules, sense stress, and localize signals, among other functions [44]. Via LLPS, PKA RI $\alpha$  forms membraneless organelles that contain cAMP at a concentration that is higher than the cAMP concentration in the bulk cytosol. These organelles are thought to provide a cAMP-buffering function, and might also include other molecules involved in cAMP signaling such as ACs, PDEs, or other, although direct evidence is still lacking. Fluorescence recovery after photobleaching (FRAP) experiments performed using fluorescent cAMP show a slower fluorescence recovery within RI $\alpha$  condensates versus cAMP in the surrounding cytosol, with the diffusivity being around 0.004  $\mu\text{m}^2/\text{s}$  for cAMP in the droplets and more than 100  $\mu\text{m}^2/\text{s}$  for the regions outside the droplets. Based on these observations, the authors conclude that RI $\alpha$  condensates might be able to act as a buffer for cAMP. The binding of cAMP to RI $\alpha$  activates the catalytic (C) subunit, allowing it to phosphorylate its targets [45]. RI $\alpha$  condensates appear to encompass also C subunits, providing a model for how cAMP, and C subunits, can be entrapped locally thus contributing to local regulation of signaling [43].

These exciting new findings prompt further questions regarding what the function of the RI $\alpha$  condensates might be in the cell besides their proposed buffering effect. Other biomolecular condensates are known to be important for promoting enzymatic reaction optimizations, but it is currently unknown if and how LLPS affects PKA activity [44]. Computational approaches integrating cAMP diffusion and PKA measurements with PKA LLPS could help elucidate the required ratios of diffuse to condensed PKA for buffering to occur. Other cAMP-binding proteins, in principle, could provide a similar cAMP-buffering mechanism, if they were able to phase-separate. Indeed, a recently published study suggests that cAMP can act through EPAC1 to trigger LLPS and form nuclear condensates [46]. EPAC1 seems to be able to form condensates *in vitro* and in cells, and the concentration of the protein required for condensation *in vitro* is reduced upon cAMP addition.

The suggestion that cAMP can directly modulate the dynamics of biomolecular condensates including PKA RI $\alpha$  and EPAC1 is interesting as this would provide a mechanism for regulation of protein-phase separation by an endogenous ligand. It remains unclear if cAMP diffusion coefficient inside the nuclear EPAC1 condensates is reduced in a similar way as reported for RI $\alpha$  puncta [43]. If confirmed, the ability of cAMP to directly regulate the dynamics of phase separation would provide another important mechanism to achieve compartmentalized signaling in basal and stress conditions. Further investigations of the functional impact of PKA-phase separation will hopefully help elucidate its physiological roles.

## Regulation of cardiac function by cAMP nanodomains

In the heart cAMP-mediated signaling regulates calcium handling, myofilament function, gene expression, and metabolism. The small size of cAMP nanodomains allows specific regulation, preventing signaling interference that



may derive from modulation of proteins that are in relative vicinity to each other but are tasked with executing distinct cellular effects. One example is the generation of distinct cAMP pools by  $\beta$ -AR and GLP-1 receptors at the plasmalemma mentioned above. This could in principle apply also to L-type calcium channels (LTCC) and Ryanodine receptors (RyR) in the dyadic cleft, or troponin and titin at the myofilament. The tight spatial regulation of cAMP nanodomains provides an opportunity for targeted therapeutic intervention and the potential for development of more effective drugs with reduced side effects. For example, the PDE3 inhibitor milrinone has an acute positive inotropic effect and enhances stroke volume in HF patients [47]. However, in the long term, PDE3 inhibition increases the likelihood of arrhythmias and its administration to patients is associated with increased mortality [48,49], limiting its indication to the treatment of acute, refractory HF. Such side effects could perhaps be avoided by targeting more selectively one of the four PDE3 isoforms rather than inhibiting global PDE3 activity [50]. An approach that disrupts protein–protein interactions between AKAP and PKA or AKAP and a PDE might prove to be more successful, as it would allow to modulate cAMP levels very selectively at an individual signalosome. Below, we review the current knowledge on how cAMP nanodomains are involved in the regulation of cardiac function, how they impact cardiovascular diseases and how they could potentially be targeted for therapeutic purposes.

## Regulation of calcium handling

cAMP regulation of calcium signaling at subcellular sites ensures proper cardiac function [51–53]. PKA-dependent phosphorylation regulates the function of some of the main players in the regulation of the calcium transient that drives contraction and relaxation, including the activity of LTCCs and, via PLN phosphorylation, SR calcium reuptake. In disease, impaired calcium cycling induces abnormal cardiac contractility leading to cardiovascular disorders including HF and arrhythmias [54–56].

### Domains

One of cAMP domains associated with calcium handling includes LTCCs. Upon cAMP production following  $\beta$ AR stimulation, PKA anchored to AKAP18 $\alpha$  is activated leading to increased open probability of the LTCC in cardiomyocytes [57–60]. Recently, it has been reported that, rather than via direct phosphorylation of LTCCs, this is achieved via phosphorylation of Rad, a member of the Ras-related GTP-binding protein subfamily, that, in its unphosphorylated state, inhibits LTCC in mouse cardiomyocytes [61–64]. PDE4B and PDE4D appear to be the predominant PDEs that degrade cAMP in proximity to LTCC, at least in rodents [65] (Figure 2). However, additional control of signal specification is provided by GPCRs and AC5 and AC6, which are in close proximity to LTCCs [66]. For example, on  $\beta$ 2AR stimulation, regulation of cAMP levels in proximity of LTCC appears to be predominantly dependent on PDE3 followed by PDE4, whereas cAMP generated in response to  $\beta$ 1AR is mostly degraded by PDE4, PDE3, and PDE2 [67]. Recently, Muller et al. reported that PDE1 inhibition after  $\beta$ AR stimulation increases CaV1.2 conductance without affecting the phosphorylation of other PKA targets (PLN, TnI, or myosin-binding protein C (MyBPC)) in primary guinea pig myocytes [68]. The precise mechanisms of PDE1-mediated cAMP regulation at LTCC site remain to be elucidated. Besides AKAP18 $\alpha$ , AKAP79 and SAP97 are other AKAPs that interact with LTCCs [69,70]. Disruption of the LTCC, PKA, SAP97, and PDE4D8 complex appears to activate LTCC via PKA-dependent phosphorylation due to the reduction in PDE4D8 activity at the signalosome [69]. AKAP79 interaction with AC5/AC6 controls the phosphorylation of ACs, thereby modulating their production of cAMP. Knocking out AKAP79 impairs calcium handling in cardiomyocytes, with a loss of PKA-mediated RyR phosphorylation and SR calcium release [70]. Other cAMP domains localized at the plasmalemma are also important for calcium-handling regulation. For example, canonical transient receptor potential channels (TRPC) expressed in embryonic chick cardiomyocytes form a complex with the LTCC [71]. TRPC3-mediated calcium entry activates PDE1C via CaM, thereby inducing a reduction in cAMP produced by the adenosine A2 receptor–G $\alpha_s$  signaling [72].

At the cardiomyocyte SR, SERCA is anchored to AKAP18 $\delta$  forming a domain with PKA, PDE3A1, PDE4D, SERCA2, PLN, CaM, and CaMKII $\delta$  [73,74]. PKA-mediated phosphorylation of PLN results in the dissociation of PLN from SERCA2, allowing diastolic SR calcium reuptake and myofilament relaxation [60]. Interestingly, cAMP levels raise in the AKAP18 $\delta$  domain after  $\beta$ 1AR but not after  $\beta$ 2AR stimulation, and this difference is eliminated after inhibition of PDEs [75], with PDE3 and PDE4 being implicated in the regulation of cAMP at this site [76,77]. Calcium release from SR via RyR is also controlled by cAMP but unlike the SERCA/PLN domain, the regulation of cAMP signaling near RyR in rats is not influenced by PDE2, PDE3, or PDE4 under basal conditions [30]. RyR is anchored by mA-KAP $\beta$  forming a signalosome including AC5, PDE4D3, and PKA. Only  $\beta$ 1AR stimulation induces a significant increase in cAMP near RyR, whereas the increase after  $\beta$ 2AR stimulation appears minimal [78–80]. mA-KAP $\beta$  also forms a signalosome at the nuclear envelope that appears to be involved in cardiac remodeling and response to hypertrophic stimuli [81,82].

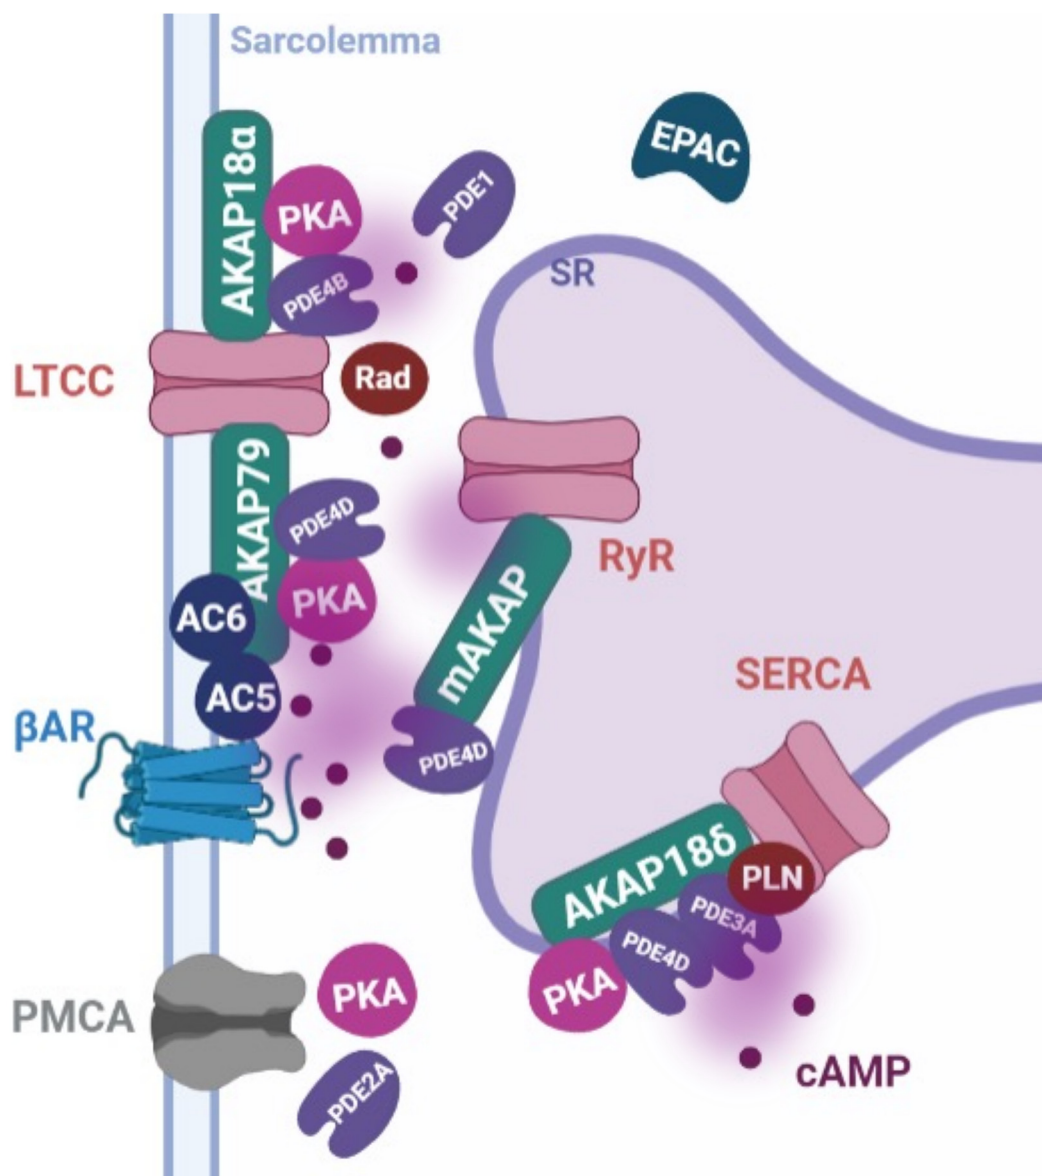

**Figure 2. Main cAMP-domains associated with calcium-handling in cardiomyocytes**

LTCC are anchored by AKAP18 $\alpha$ , and cAMP levels near the channel are predominantly controlled by PDE4B, PDE4D, and PDE3. PDE1 appears to be involved in signaling regulation as well. In proximity to LTCCs, AC5 and AC6 produce cAMP. Both cyclases are known to interact with AKAP79. On the membrane, calcium signaling via PMCA channels influences calcium signaling in the cell. On the SR, AKAP18 $\delta$  anchors SERCA, PLN, PKA, and PDE3A with PDE4D controlling cAMP signalosome. Calcium release via RyR is also regulated by cAMP. RyR are in proximity to mAKAP $\beta$  that also interacts with PDE4D. Abbreviations: AC, adenylyl cyclase; AKAP: A-kinase anchoring protein;  $\beta$ AR,  $\beta$  adrenergic receptor; EPAC, exchange protein directly activated by cAMP; PDE, phosphodiesterase; PKA, protein kinase A; PLN, phospholamban; PMCA, plasma membrane calcium ATPase; LTCC, L-type calcium channel; RyR, Ryanodine channel; SERCA, SR calcium ATP-ase, SR, sarcoplasmic reticulum.

## Diseases

Multiple cardiac disorders associated with mechanical dysfunction, aberrant calcium handling, and arrhythmias show a reorganization of cAMP domains [35,83,84]. Alterations including down-regulation of PDE4A, PDE4B, PDE3A, AKAP79, AC, and  $\beta$ 1AR and up-regulation of PDE2 have been reported in HF [85–90]. In a mouse model of mild HF induced by transverse aortic constriction (TAC), PDE2 was found to be redistributed from  $\beta$ 1AR (predominant

association in healthy hearts) to  $\beta$ 2AR, despite global PDE2 expression and activity being unchanged, leading to the hypothesis that such changes may promote the cardiac remodeling found in HF [67].

In another study, PDE4D3 activity was shown to be decreased at the RyR signalosome in failing myocytes, leading to hyperphosphorylation of RyR [91], although the contribution of this mechanism to HF pathogenesis is not clear [92]. In failing myocytes, several PKA targets are hypophosphorylated, including PLN, which accounts for the reduced SERCA2 activity. Studies using a PLN-targeted Fluorescence Resonance Energy Transfer (FRET) sensor demonstrate that even though cytosolic PDE4 activity is reduced in mice models of HF, this activity is retained in the SERCA-PLN cAMP domain, while the contribution of PDE2 to local cAMP control is significantly increased [93]. In addition, the difference between cytosolic- and domain-specific cAMP levels, following  $\beta$ AR stimulation is abolished in disease. Less is known about signalosome changes related to the LTCC domain, besides the observation that LTCC open probability is increased, which could be attributed to alteration of local signaling and phosphorylation events [94]. Whether Rad phosphorylation is affected in HF remains unknown, but its overall expression was found to be decreased in HF, possibly as a compensatory response [95]. Alteration of calcium handling is thought to be detrimental not only for the increased likelihood of arrhythmias but also for the involvement of calcium in the activation of the CaN-NFATc (calcineurin - nuclear factor of activated T cells) pathway. CaN interacts with the mAKAP $\beta$  signalosome resulting in NFATc dephosphorylation and translocation into the nucleus, leading to cardiac hypertrophy [96].

### Potential for drug targeting

Several approaches have been tested in order to restabilize cAMP control of calcium handling in the cells, including attempts to disrupt the interaction of AKAPs with individual binding partners. The AKAP18 $\alpha$ -LTCC interaction disrupting peptide AKAP15LZ (38–54) was found to abolish PKA-mediated LTCC phosphorylation [57,97]. So far, no therapeutic use has been suggested for the peptide, but the authors highlight its usability for precise targeting of PKA for regulation of L-type calcium currents [57]. A peptide named 'PLN peptide' disrupts the interaction between AKAP18 $\delta$  and PLN [77]. Although this would be of limited use in HF, as PLN phosphorylation is down-regulated in this condition, physically displacing PLN from SERCA2 might be beneficial in postinfarction, to limit the effects of chronic adrenergic signaling [98].

PDEs have also been considered as potential therapeutic targets in heart disease. For example, the PDE1 inhibitor ITI-214 (lenrispodun) demonstrates a positive inotropic effect and is undergoing phase II trials for the treatment of HF [99]. Due to the localized effects of PDE1 inhibition, targeting PDE1 could provide a novel positive inotropic therapy for HF without off-site effects commonly observed with PDE3 inhibitors.

Even though the major focus in the drug-development field targeting PDEs remains the search for isoform-specific inhibitors and activators, a vastly unexplored avenue is the disruption of PDE-AKAP interactions. Displacement or selective activation of PDEs within an individual signalosome would allow higher precision in the therapeutic intervention.

### Fine-tuning of myofilament contraction and relaxation

Besides calcium-related processes, cAMP signaling ensures proper cardiac contraction and relaxation via the regulation of myofilament proteins. PKA-dependent phosphorylation of myofilament proteins tunes calcium sensitivity of troponin and modulates MyBPC activity, increasing the speed of cross-bridge formation [100]. Evidence suggests that cAMP compartments at the myofilament are sufficiently small, so that proteins such as TnI and MyBPC may be under the control of distinct cAMP nanodomains [28]. Dysregulation and reorganization of PDE signaling at the contractile apparatus appears to be implicated in cardiovascular disorders.

### Domains

Upon  $\beta$ AR activation, PKA phosphorylates TnI at position S23 and S24 leading to faster relaxation and increased cross-bridge cycling rate as a consequence of reduced sensitivity of the myofilament to calcium [101,102]. The troponin complex consists of TnI, troponin C and troponin T (TnT). The latter acts as an AKAP, tethering PKA to the troponin complex [103]. Interestingly, cAMP increase following  $\beta$ AR stimulation is significantly lower in proximity of TnI than in the cytosol, or at other signalosomes such as AKAP18 $\delta$  [32], and different PDEs seem to be involved in cAMP compartmentation at the myofilament (Figure 3).

Under  $\beta$ AR stimulation, PDE4 and PDE3 seem to be the main phosphodiesterases controlling cAMP levels near TnI, and PDE2 contributes to a lesser extent in rat hearts [30]. However, in the absence of  $\beta$ AR activation, PDE4 inhibition does not affect sarcomere shortening or TnI phosphorylation suggesting that PDE4 might be recruited to the myofilament following  $\beta$ AR stimulation. Both MyBPC and TnI interact with myomegalin (also called PDE4DIP), an AKAP involved in the control of MyBPC and TnI phosphorylation [104]. The exact localization and constitution

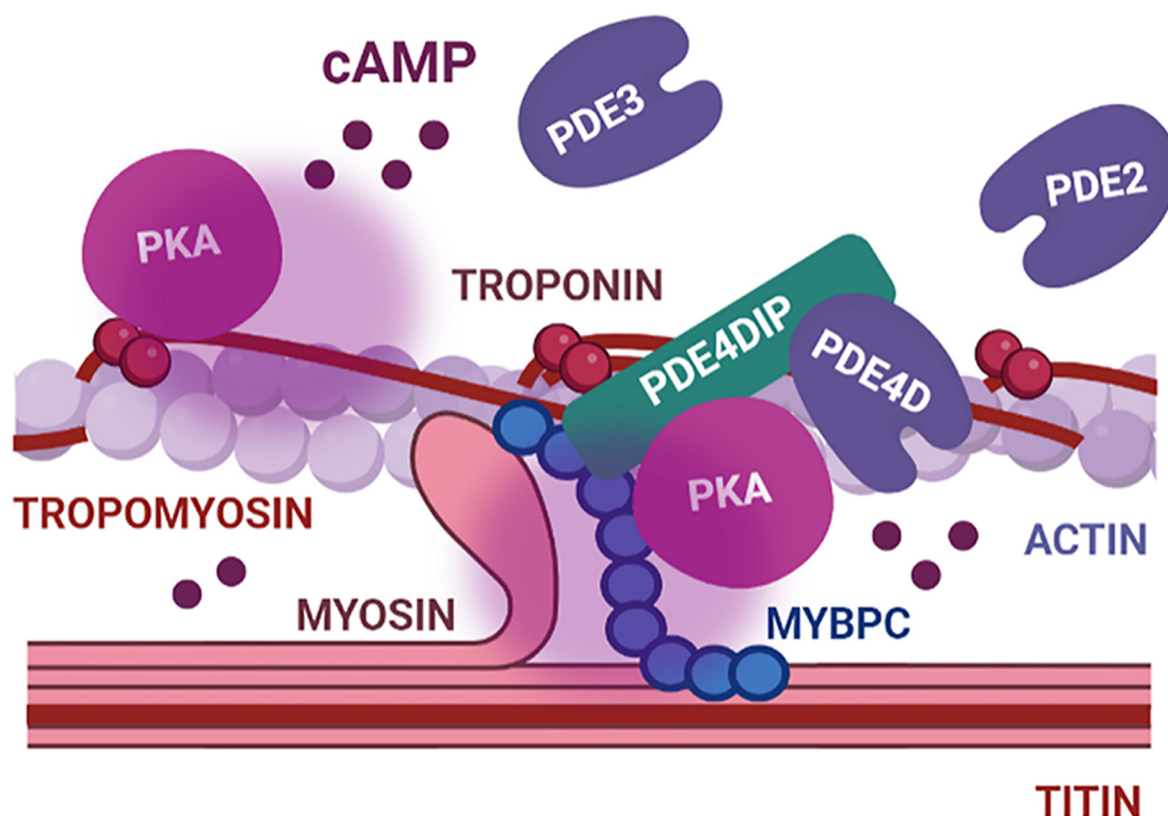

**Figure 3. cAMP signaling domains related to myofilament function regulation in cardiomyocytes**

This nanodomain includes PKA anchored by the AKAPs TnT and PDE4DIP. cAMP signaling at the myofilament is controlled by PDE4, PDE3, and PDE2. Abbreviations: PDE, phosphodiesterase; PDE4DIP, PDE4D-interacting protein; PKA, protein kinase A.

of the domain associated with PDE4DIP is unclear, although mutations in PDE4DIP are known to impair cAMP signaling at the myofilament giving rise to arrhythmias [105].

The PDE4D-interacting protein MyBPC is phosphorylated at up to four sites by various kinases, including PKA, and its phosphorylation is down-regulated in failing human hearts [106]. PDEs are important for reducing cAMP levels in the MyBPC-associated nanodomain, and inhibition of PDE2, PDE3, or PDE4 increases MyBPC phosphorylation [30].

Whether PDEs regulate PKA-dependent phosphorylation of titin remains to be fully investigated. This is of importance as titin is essential in the regulation of passive stiffness and its role in other processes such as active tension generation, is emerging [107]. It is reported that PKA-dependent phosphorylation of the titin region N2B causes a decrease in stiffness enhancing diastolic filling during adrenergic stimulation [108]. Mutations in titin are known to cause diseases such as dilated cardiomyopathy (DCM) and HF, but the mechanisms are not fully understood. Titin binds multiple proteins in the myofilaments including  $\alpha$ -Synemin, an AKAP that anchors PKA and PP2A to the M-band [109]. Besides PP2A, PP5, and PP1 have been reported to dephosphorylate titin, but only PP5 effects have been shown *in vivo* [110]. Titin size and its multiple interactors as well as multiple phosphorylation sites make studying local cAMP regulation of titin more challenging.

### Diseases

Disruption of cAMP-dependent regulation of myofilament function is associated with multiple cardiovascular disorders. Reduced phosphorylation of TnI and MyBPC has been reported in human and experimental HF samples, despite total PKA activity following cAMP stimulation being comparable between failing and nonfailing human hearts [106,111,112]. In some animal models, the phosphorylation of TnI appears to be increased rather than decreased [113]. However, in rat hearts, the cAMP signal triggered by  $\beta$ AR stimulation was found to be significantly reduced at



the myofilament but preserved at the SR and in the cytosol [32]. In hypertrophic rabbit myocytes, PKA signaling at the myofilaments was reportedly up-regulated inducing contractile dysfunction due to a redistribution of PDEs [114]. It is likely that, in the failing myocyte, rather than just down-regulation or inactivation, PDEs and subsequently PKA and possibly AKAPs may undergo a reorganization and redistribution, which may result in hypo- or hyperphosphorylation of TnI and MyBPC and may be specific to diseases of different etiologies and possibly to different stages of disease.

A123T mutations in PDE4DIP are associated with early-onset atrial fibrillation and heart block, which appears to be induced by impairment of PKA and PDE4D compartmentation, resulting in increased cAMP near the  $\beta$ 2AR site and decreased PKA phosphorylation of desmin [105]. The TnT R173W mutation presents with impaired cardiomyocyte contractility due to disrupted interactions between troponin and tropomyosin, and reduced PKA binding to sarcomere domains, causing TnI hypophosphorylation in DCM [115].

Similar to TnI and MyBPC, the phosphorylation profile of titin is also altered in cardiac disorders. In HFpEF and cardiomyopathies (DCM and HCM), cardiomyocytes appear to be stiffer having an increased passive tension, which is thought to depend on hypophosphorylation of titin [116,117]. Currently, little is known about titin-associated cAMP signalosomes and their reorganization in disease.

### Potential for drug targeting

Myofilament proteins regulated by cAMP via PKA are hypophosphorylated in human HF and cardiomyopathies, in line with findings demonstrating that, despite maintained cAMP levels at the cytosol, cAMP signals triggered by  $\beta$ AR stimulation are significantly reduced at the myofilament [32]. Interestingly, the main PDEs known to regulate cAMP at the myofilament are underexpressed in failing hearts, although changes in their spatial (re)distribution are underexplored highlighting the need for further investigations [89,91]. Currently, there are no pharmacological agents that aim to modulate PKA activity at the myofilament, or the myofilament-associated interactions with AKAPs or PDEs.

## Regulation of cardiac gene expression by cAMP

cAMP is an important regulator of gene expression. cAMP-dependent targets in this context include cAMP response element-binding protein (CREB), NFAT, and glycogen synthase kinase-3 $\beta$  (GSK-3 $\beta$ ). Dysregulation of these signaling cascades is associated with the development of hypertrophy and other cardiac disorders. So far, limited therapeutic approaches have been proposed in order to modulate regulation of cAMP-mediated gene expression.

### Domains

CREB is a transcription factor involved in the control of the expression of multiple genes including somatostatin, c-fos, genes coding for enzymes involved in gluconeogenesis, neuropeptides, and circadian clocks components, such as PER [118]. Through CREB, cAMP regulates the expression of metabolic, cell cycle, and cell survival pathways. CREB initiates transcription after activation by cAMP response element (CRE), the activity of which is induced by PKA phosphorylation at S133 [119]. CRE can also be phosphorylated by other kinases such as CaMKII [120]. In HEK293 cells, CREB-signaling domain includes AKAP95 (AKAP8), PP2A, PP1, PDE4D5, and PDE4A3 [120–122] (Figure 4). Local cAMP generation within this domain upon  $\beta$ AR activation is thought to be executed by AC10, an isoform that is not activated by  $G_s$  and is not associated with the plasmalemma. Experimental and simulation studies show that activation of  $\beta$ 2AR has a significant effect on CREB and GATA4 activity, which may exacerbate hypertrophic gene expression in HF when the  $\beta$ 1/ $\beta$ 2 AR ratio decreases [123]. Studies in HEK293T cells suggest that the CREB-associated cAMP domain is not activated by plasmalemma-bound ACs, as cytosolic PDE3 provides a barrier-preventing accumulation in the nucleus of cAMP generated at the cell membrane [121,124].

Another cAMP signalosome involved in the regulation of gene expression is associated with mAKAP $\beta$  and involves hypoxia-inducible factor 1 $\alpha$  (HIF1 $\alpha$ ), MEF2, NFATc, and type II HDACs [82,96,125,126]. mAKAP $\beta$  facilitates the transcription of pro-hypertrophic genes via cAMP-dependent and cAMP-independent pathways (by activating MAPK effector kinase p90RSK and modulating HIF1 $\alpha$ ) [127,128]. The signalosome includes PKA, PDE4D3, and Epac1 (Figure 4). Upon cAMP increase, PKA anchored to mAKAP $\beta$  phosphorylates PDE4D enhancing its activity and leading to cAMP degradation [129]. mAKAP $\beta$  associated ERK5, which is involved in activation of cardiomyocyte hypertrophy [130], suppresses PDE4D3 activity thereby promoting PKA activation. PKA regulates gene expression via the phosphorylation of HDAC, NFAT, and GSK-3 $\beta$  [131,132].

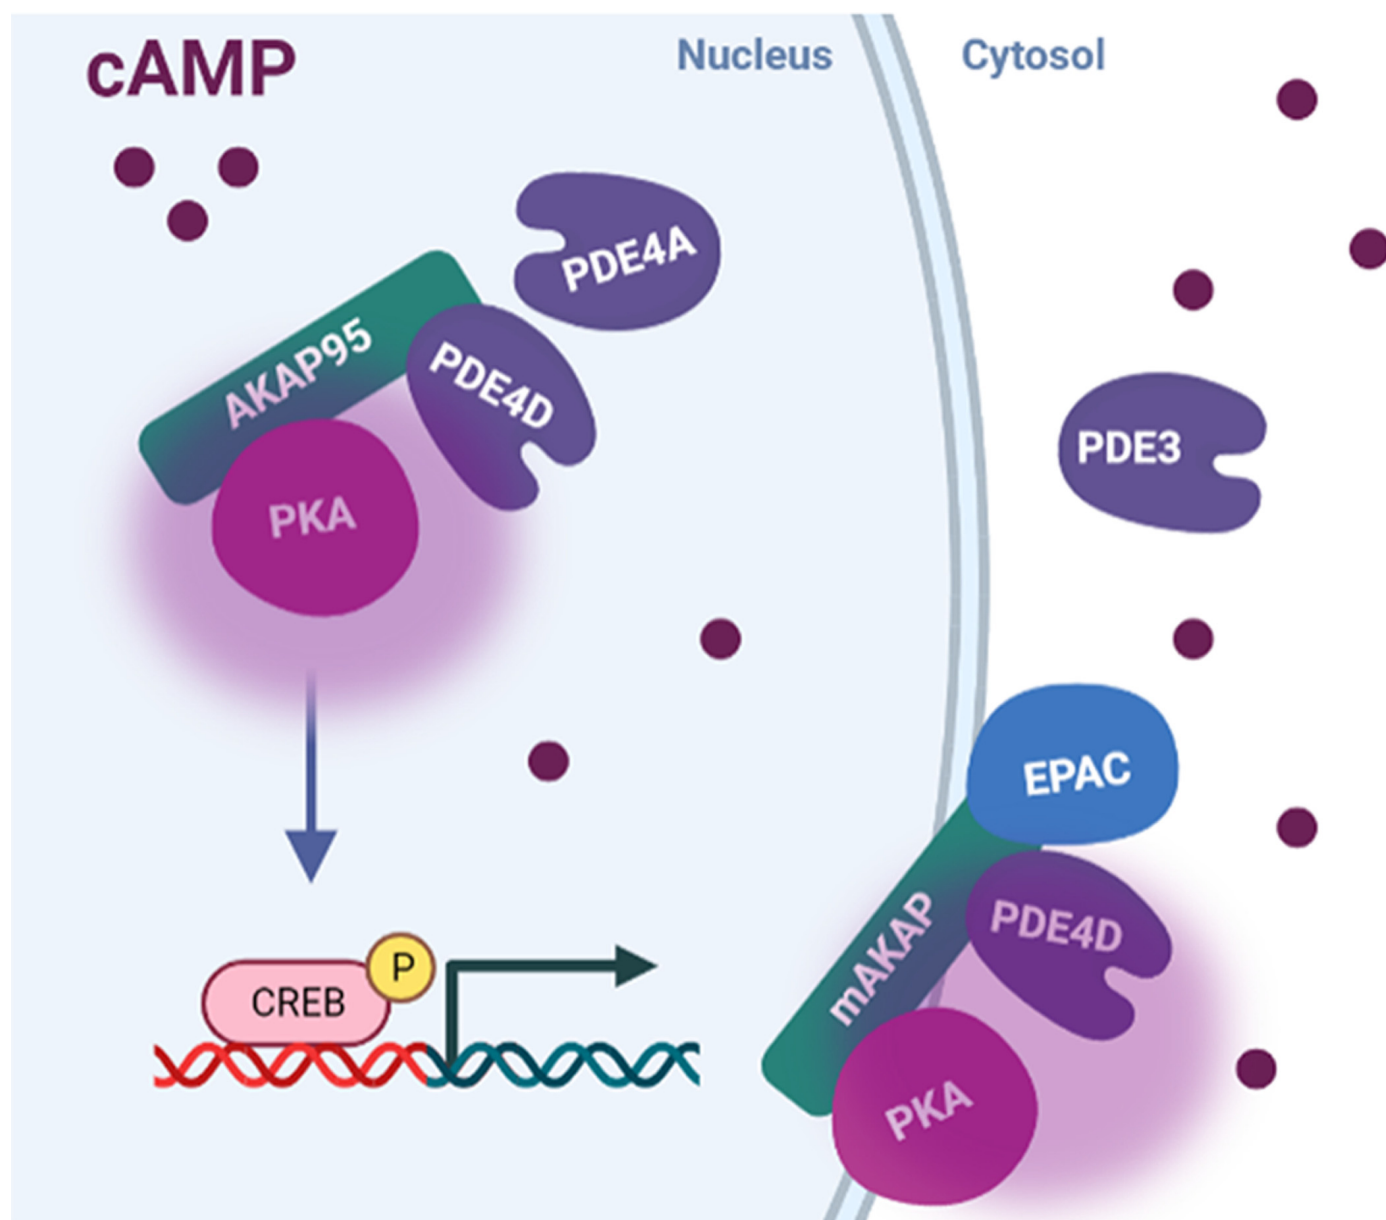

**Figure 4. cAMP domains associated with gene expression regulation**

cAMP in the nucleus is produced by soluble ACs. AKAP95 was found to anchor PKA in the nucleus in HEK293T cells, forming a cAMP domain regulated by PDE4A and PDE4D. cAMP in the nucleus regulates gene expression related to cell hypertrophy, apoptosis, and other processes. On the nuclear membrane, another cAMP domain includes mAKAP $\beta$ , EPAC, PKA, and PDE4D. Abbreviations: AKAP, A-kinase anchoring protein; CREB, cAMP response element-binding protein; EPAC, exchange protein directly activated by cAMP; PDE, phosphodiesterase; PKA, protein kinase A.

### Diseases

Multiple studies link cAMP-mediated regulation of gene expression with cardiac disorders. Overexpression of dominant-negative CREB in mice leads to an increase in mortality and mitochondrial dysfunction in mice [133]. Moreover, mice with dominant negative CREB appear to have an impaired contractile response to isoproterenol and cardiac dilatation [134]. CREB has been demonstrated to be important for ion channel function, as in CREB knock-out mice action potentials are prolonged [135]. In animal models of HF, phosphorylation of CREB Ser133 appears

to be decreased during cardiac remodeling, suggesting that dysregulation of cAMP and PKA control of CREB may contribute to the pathogenesis of this condition [136].

Recent findings show that alterations in  $G_{s\alpha}$  expression found in mice after TAC decrease CREB expression and inhibit Bmp10 signaling, leading to cardiac remodeling in HF [137]. Key molecular events contributing to cardiac hypertrophy include MEF2-, CREB-, and NFAT-mediated gene transcription. Mechanistically, upon  $G_{s\alpha}$ -stimulated cAMP synthesis, PKA activation in the nucleus activates CREB and lifts GSK3 $\beta$ -mediated NFAT repression, which promotes hypertrophy. Due to cAMP and PKA-signaling compartmentation, a cytoplasmic PKA pool appears to play a completely different role: activation of PKA outside the nucleus inhibits hypertrophy through HDAC4/5-mediated MEF2 repression, inactivating NFAT and suppressing Drp1. NFAT5 activation after GSK-3 $\beta$  phosphorylation by PKA is also important for modulating responses to biomechanical stretch, stress, and disease [131,132].

The mAKAP $\beta$  domain is also implicated in hypertrophy. mAKAP $\beta$ -bound PKC $\epsilon$  and PKD activation secondary to EPAC-PLC $\epsilon$ -dependent phosphatidylinositol-4-phosphate (PI4P) hydrolysis, leads to phosphorylation, and nuclear export of type IIa HDACs and induction of hypertrophy [138]. PKA activation acts as a cardioprotective antihypertrophic mechanism inhibiting PLC $\epsilon$ -dependent PI4P hydrolysis [139].

### Potential for drug targeting

Different approaches have been explored to modulate cAMP signaling to control cardiac hypertrophy. Reduction in cAMP in the CREB signalosome via PDE4 activation has been suggested as a potential way to reduce hypertrophy. PDE4 activation has also been proposed as a therapeutic approach. The PDE4 activator UCR1C has been shown to attenuate cardiomyocyte hypertrophy in preclinical models, and its positive effects are executed via the regulation of PKA nuclear activity [140]. Other PDE4 long-form activators, such as MR-L2, have been proposed for the treatment of polycystic kidney disease, but their potential benefit in heart diseases remains unclear [141].

Other approaches include the disruption of the interaction between AKAPs and other signaling molecules. For example, disruption of AKAP-Lbc and p38 MAPK interaction appears to protect mice from hypertrophic remodeling in response to TAC [142]. Another useful approach for treating HF-associated cardiac remodeling could be implemented by using the peptide CaNBD that disrupts mAKAP $\beta$ -CaN interaction. Such modulation has been reported to reduce hypertrophy in rat cardiomyocytes via modulation of the NFAT pathway [143]. mAKAP $\beta$  delocalization via disruption of mAKAP $\beta$ -nesprin interaction appears to have a cardio-protective effect mediated by ERK5 inhibition. As mAKAP $\beta$ -nesprin anchors PDE4D3 with ERK5, MEK5, and EPAC1, ERK5 activation induces PDE4D3 phosphorylation and inhibition, which in turn enhances PKA/RyR/cytoplasmic calcium/CaN/nuclear NFATc3 pathway [130]. Additional control of ERK5 is provided by EPAC1 that, when activated, inhibits ERK5 activity, and acts as an antihypertrophic agent. Therefore, mAKAP $\beta$ -nesprin-disrupting peptides can potentially elicit precisely executed antihypertrophic effects [130].

## Conclusions and future perspectives

Cardiovascular disease continues to exert a substantial burden on the healthcare system. Gaining a better understanding of the local cAMP-signaling organization could be key in developing precise and effective therapies. As evidenced by the previous studies using PDE inhibitors, targeting global intracellular cAMP signals rarely provides the desired effects, highlighting the importance of more precise therapeutic interventions. However, despite exciting new developments in the field, multiple questions remain open and will have to be addressed before cAMP nanodomain signaling can be exploited for therapeutic intervention. Further characterization of cAMP-buffering mechanisms will be essential to fully elucidate the main physiological mechanisms involved in the control of local cAMP levels [36,43]. Mapping cAMP nanodomains, their function, and distinct cAMP control patterns in physiological and pathological settings utilizing multiomics techniques can help dissect and define the details of the intracellular cAMP landscape [144]. The integration of cAMP domain knowledge utilizing computational tools can provide a holistic understanding of cAMP signaling effects in the heart and a framework for *in silico* mechanistic investigations of pathogenic alterations and for simulation of potential therapeutic approaches [145–147]. The combination of new computational and experimental techniques, such as optogenetic modulation of cAMP effectors, has the potential to further expand our understanding of cAMP-signaling organization [148]. Shifting the focus of the investigations from global to domain-specific cAMP signaling will undoubtedly help discover alterations in cAMP signaling in cardiac diseases, which remain to be identified.

### Competing Interests

The authors declare that there are no competing interests associated with the manuscript.

## Funding

This work was supported by the British Heart Foundation [grant numbers PG/15/5/31110, RG/17/6/32944, FS/4yPhD/F/20/34132] and the BHF Centre of Research Excellence, Oxford [grant numbers RE/13/1/30181, RE/18/3/34214, RE/18/3/34214]. All figures were created using BioRender.com.

## Open Access

Open access for the present article was enabled by the participation of University of Oxford in an all-inclusive *Read & Publish* agreement with Portland Press and the Biochemical Society under a transformative agreement with JISC.

## CRedit Author Contribution

**Milda Folkmanaitė:** Writing—original draft, Writing—review & editing. **Manuela Zaccolo:** Conceptualization, Supervision, Funding acquisition, Writing—original draft, Writing—review & editing.

## Abbreviations

$\beta$ AR,  $\beta$  adrenergic receptor; AC, adenylyl cyclase; AKAP, A-kinase anchoring protein; C, catalytic; cAMP, 3', 5' - cyclic adenosine monophosphate; CaN, calcineurin; CNGC, cyclic nucleotide-gated channel; CRE, cAMP response element; CREB, cAMP response element-binding protein; DCM, dilated cardiomyopathy; EPAC, exchange protein-activated by cAMP; FRET, Fluorescence Resonance Energy Transfer; GPCR, G-protein coupled receptor; GSK-3 $\beta$ , glycogen synthase kinase-3 $\beta$ ; HCM, hypertrophic cardiomyopathy; HF, heart failure; HFpEF, HF with preserved ejection fraction; HIF1 $\alpha$ , hypoxia-inducible factor 1 $\alpha$ ; LLPS, liquid-liquid phase separation; LTCC, L-type calcium channel; MyBPC, myosin-binding protein C; NFATc, nuclear factor of activated T cell; PDE, phosphodiesterase; PI4P, phosphatidylinositol-4-phosphate; PKA, protein kinase A; PLN, phospholamban; POPDC, Popeye domain-containing; PP, phosphatase; RI $\alpha$ , PKA regulatory subunit type I $\alpha$ ; RyR, Ryanodine receptor; SERCA, SR calcium ATP-ase; SR, sarcoplasmic reticulum; TAC, transverse aortic constriction; TnI, troponin I; TnT, troponin T; TRPC, transient receptor potential channel.

## References

- Levitzi, A. (1988) From epinephrine to cyclic AMP. *Science* **241**, 800–806, <https://doi.org/10.1126/science.2841758>
- Mons, N., Decorte, L., Jaffard, R. and Cooper, D.M. (1998) Ca<sup>2+</sup>-sensitive adenylyl cyclases, key integrators of cellular signaling. *Life Sci.* **62**, 1647–1652, [https://doi.org/10.1016/S0024-3205\(98\)00122-2](https://doi.org/10.1016/S0024-3205(98)00122-2)
- Francis, S.H., Blount, M.A. and Corbin, J.D. (2011) Mammalian cyclic nucleotide phosphodiesterases: molecular mechanisms and physiological functions. *Physiol. Rev.* **91**, 651–690, <https://doi.org/10.1152/physrev.00030.2010>
- Rodbell, M., Birnbaumer, L., Pohl, S.L. and Krans, H.M. (1971) The glucagon-sensitive adenylyl cyclase system in plasma membranes of rat liver. V. An obligatory role of guanylnucleotides in glucagon action. *J. Biol. Chem.* **246**, 1877–1882, [https://doi.org/10.1016/S0021-9258\(18\)62390-7](https://doi.org/10.1016/S0021-9258(18)62390-7)
- Ross, E.M. and Gilman, A.G. (1977) Resolution of some components of adenylyl cyclase necessary for catalytic activity. *J. Biol. Chem.* **252**, 6966–6969, [https://doi.org/10.1016/S0021-9258\(19\)66920-6](https://doi.org/10.1016/S0021-9258(19)66920-6)
- Moore-Morris, T., Varrault, A., Mangoni, M.E., Le Digarcher, A., Negre, V., Dantec, C. et al. (2009) Identification of potential pharmacological targets by analysis of the comprehensive G protein-coupled receptor repertoire in the four cardiac chambers. *Mol. Pharmacol.* **75**, 1108, <https://doi.org/10.1124/mol.108.054155>
- Francis, S.H. and Corbin, J.D. (1994) Structure and function of cyclic nucleotide-dependent protein kinases. *Annu. Rev. Physiol.* **56**, 237–272, <https://doi.org/10.1146/annurev.ph.56.030194.001321>
- Jurevicius, J. and Fischmeister, R. (1996) cAMP compartmentation is responsible for a local activation of cardiac Ca<sup>2+</sup> channels by beta-adrenergic agonists. *Proc. Natl. Acad. Sci. U.S.A.* **93**, 295–299, <https://doi.org/10.1073/pnas.93.1.295>
- Jurevicius, J. and Fischmeister, R. (1996) Acetylcholine inhibits Ca<sup>2+</sup> current by acting exclusively at a site proximal to adenylyl cyclase in frog cardiac myocytes. *J. Physiol.* **491**, 669–675, <https://doi.org/10.1113/jphysiol.1996.sp021248>
- Zaccolo, M., De Giorgi, F., Cho, C.Y., Feng, L., Knapp, T., Negulescu, P.A. et al. (2000) A genetically encoded, fluorescent indicator for cyclic AMP in living cells. *Nat. Cell Biol.* **2**, 25–29, <https://doi.org/10.1038/71345>
- Zaccolo, M. and Pozzan, T. (2002) Discrete microdomains with high concentration of cAMP in stimulated rat neonatal cardiac myocytes. *Science* **295**, 1711, <https://doi.org/10.1126/science.1069982>
- Zaccolo, M., Zerio, A. and Lobo, M.J. (2021) Subcellular organization of the cAMP signaling pathway. *Pharmacol. Rev.* **73**, 278, <https://doi.org/10.1124/pharmrev.120.000086>
- Hayes, J.S., Brunton, L.L. and Mayer, S.E. (1980) Selective activation of particulate cAMP-dependent protein kinase by isoproterenol and prostaglandin E<sub>1</sub>. *J. Biol. Chem.* **255**, 5113–5119, [https://doi.org/10.1016/S0021-9258\(19\)70757-1](https://doi.org/10.1016/S0021-9258(19)70757-1)
- Di Benedetto, G., Zoccarato, A., Lissandron, V., Terrin, A., Li, X., Houslay, M.D. et al. (2008) Protein kinase A type I and type II define distinct intracellular signaling compartments. *Circ. Res.* **103**, 836–844, <https://doi.org/10.1161/CIRCRESAHA.108.174813>
- Nikolaev, V.O., Bünemann, M., Schmitteckert, E., Lohse, M.J. and Engelhardt, S. (2006) Cyclic AMP imaging in adult cardiac myocytes reveals far-reaching  $\beta$ 1-adrenergic but locally confined  $\beta$ 2-adrenergic receptor-mediated signaling. *Circ. Res.* **99**, 1084–1091, <https://doi.org/10.1161/01.RES.0000250046.69918.d5>



- 16 Lohse, M.J., Engelhardt, S. and Eschenhagen, T. (2003) What is the role of  $\beta$ -adrenergic signaling in heart failure? *Circ. Res.* **93**, 896–906, <https://doi.org/10.1161/01.RES.0000102042.83024.CA>
- 17 Kohout, T.A., Takaoka, H., McDonald, P.H., Perry, S.J., Mao, L., Lefkowitz, R.J. et al. (2001) Augmentation of cardiac contractility mediated by the human  $\beta$ 3-adrenergic receptor overexpressed in the hearts of transgenic mice. *Circulation* **104**, 2485–2491, <https://doi.org/10.1161/hc4501.098933>
- 18 Maritan, M., Monaco, G., Zamparo, I., Zaccolo, M., Pozzan, T. and Lodovichi, C. (2009) Odorant receptors at the growth cone are coupled to localized cAMP and Ca<sup>2+</sup> increases. *Proc. Natl. Acad. Sci. U.S.A.* **106**, 3537–3542, <https://doi.org/10.1073/pnas.0813224106>
- 19 Röder, I.V., Choi, K.-R., Reischl, M., Petersen, Y., Diefenbacher, M.E., Zaccolo, M. et al. (2010) Myosin Va cooperates with PKA R1 $\alpha$  to mediate maintenance of the endplate in vivo. *Proc. Natl. Acad. Sci. U.S.A.* **107**, 2031–2036, <https://doi.org/10.1073/pnas.0914087107>
- 20 Wilson, L.S., Baillie, G.S., Pritchard, L.M., Umana, B., Terrin, A., Zaccolo, M. et al. (2011) A phosphodiesterase 3B-based signaling complex integrates exchange protein activated by cAMP 1 and phosphatidylinositol 3-kinase signals in human arterial endothelial cells. *J. Biol. Chem.* **286**, 16285–16296, <https://doi.org/10.1074/jbc.M110.217026>
- 21 Parnell, E., Smith, B.O., Palmer, T.M., Terrin, A., Zaccolo, M. and Yarwood, S.J. (2012) Regulation of the inflammatory response of vascular endothelial cells by EPAC1. *Br. J. Pharmacol.* **166**, 434–446, <https://doi.org/10.1111/j.1476-5381.2011.01808.x>
- 22 Lobo, M.J., Amaral, M.D., Zaccolo, M. and Farinha, C.M. (2016) EPAC1 activation by cAMP stabilizes CFTR at the membrane by promoting its interaction with NHERF1. *J. Cell Sci.* **129**, 2599–2612, <https://doi.org/10.1242/jcs.185629>
- 23 Xiao, R.-P., Zhu, W., Zheng, M., Chakir, K., Bond, R., Lakatta, E.G. et al. (2004) Subtype-specific  $\beta$ -adrenoceptor signaling pathways in the heart and their potential clinical implications. *Trends Pharmacol. Sci.* **25**, 358–365, <https://doi.org/10.1016/j.tips.2004.05.007>
- 24 Soto, D., De Arcangelis, V., Zhang, J. and Xiang, Y. (2009) Dynamic protein kinase A activities induced by  $\beta$ -adrenoceptors dictate signaling propagation for substrate phosphorylation and myocyte contraction. *Circ. Res.* **104**, 770–779, <https://doi.org/10.1161/CIRCRESAHA.108.187880>
- 25 Yan, L., Vatner, D.E., O'Connor, J.P., Ivessa, A., Ge, H., Chen, W. et al. (2007) Type 5 adenylyl cyclase disruption increases longevity and protects against stress. *Cell* **130**, 247–258, <https://doi.org/10.1016/j.cell.2007.05.038>
- 26 Tang, T., Lai, N.C., Wright, A.T., Gao, M.H., Lee, P., Guo, T. et al. (2013) Adenylyl cyclase 6 deletion increases mortality during sustained adrenergic receptor stimulation. *J. Mol. Cell Cardiol.* **60**, 60–67, <https://doi.org/10.1016/j.yjmcc.2013.04.005>
- 27 Piggott, L.A., Bauman, A.L., Scott, J.D. and Dessauer, C.W. (2008) The A-kinase anchoring protein Yotiao binds and regulates adenylyl cyclase in brain. *Proc. Natl. Acad. Sci. U.S.A.* **105**, 13835–13840, <https://doi.org/10.1073/pnas.0712100105>
- 28 Chao, Y.-C., Surdo, N.C., Pantano, S. and Zaccolo, M. (2019) Imaging cAMP nanodomains in the heart. *Biochem. Soc. Trans.* **47**, 1383–1392, <https://doi.org/10.1042/BSR20190245>
- 29 Maurice, D.H., Ke, H., Ahmad, F., Wang, Y., Chung, J. and Manganiello, V.C. (2014) Advances in targeting cyclic nucleotide phosphodiesterases. *Nat. Rev. Drug Discovery* **13**, 290–314, <https://doi.org/10.1038/nrd4228>
- 30 Mika, D., Bobin, P., Pomérance, M., Lechêne, P., Westenbroek, R.E., Catterall, W.A. et al. (2013) Differential regulation of cardiac excitation-contraction coupling by cAMP phosphodiesterase subtypes. *Cardiovasc. Res.* **100**, 336–346, <https://doi.org/10.1093/cvr/cvt193>
- 31 Molenaar, P., Christ, T., Hussain, R.I., Engel, A., Berk, E., Gillette, K.T. et al. (2013) PDE3, but not PDE4, reduces  $\beta$ 1- and  $\beta$ 2-adrenoceptor-mediated inotropic and lusitropic effects in failing ventricle from metoprolol-treated patients. *Br. J. Pharmacol.* **169**, 528–538, <https://doi.org/10.1111/bph.12167>
- 32 Surdo, N.C., Berrera, M., Koschinski, A., Brescia, M., Machado, M.R., Carr, C. et al. (2017) FRET biosensor uncovers cAMP nano-domains at  $\beta$ -adrenergic targets that dictate precise tuning of cardiac contractility. *Nat. Commun.* **8**, 15031, <https://doi.org/10.1038/ncomms15031>
- 33 Mongillo, M., Tocchetti, C.G., Terrin, A., Lissandron, V., Cheung, Y.-F., Dostmann, W.R. et al. (2006) Compartmentalized phosphodiesterase-2 activity blunts  $\beta$ -adrenergic cardiac inotropy via an NO/cGMP-dependent pathway. *Circ. Res.* **98**, 226–234, <https://doi.org/10.1161/01.RES.0000200178.34179.93>
- 34 Mika, D., Leroy, J., Vandecasteele, G. and Fischmeister, R. (2012) PDEs create local domains of cAMP signaling. *J. Mol. Cell Cardiol.* **52**, 323–329, <https://doi.org/10.1016/j.yjmcc.2011.08.016>
- 35 Kokkonen, K. and Kass, D.A. (2017) Nanodomain regulation of cardiac cyclic nucleotide signaling by phosphodiesterases. *Annu. Rev. Pharmacol. Toxicol.* **57**, 455–479, <https://doi.org/10.1146/annurev-pharmtox-010716-104756>
- 36 Bock, A., Annibale, P., Konrad, C., Hannawacker, A., Anton, S.E., Maiellaro, I. et al. (2020) Optical mapping of cAMP signaling at the nanometer scale. *Cell* **182**, 1519.e17–1530.e17, <https://doi.org/10.1016/j.cell.2020.07.035>
- 37 Anton, S.E., Kayser, C., Maiellaro, I., Nemec, K., Möller, J., Koschinski, A. et al. (2022) Receptor-associated independent cAMP nanodomains mediate spatiotemporal specificity of GPCR signaling. *Cell* **185**, 1130.e11–1142.e11, <https://doi.org/10.1016/j.cell.2022.02.011>
- 38 Bers, D.M., Xiang, Y.K. and Zaccolo, M. (2019) Whole-cell cAMP and PKA activity are epiphenomena, nanodomain signaling matters. *Physiology* **34**, 240–249, <https://doi.org/10.1152/physiol.00002.2019>
- 39 Agarwal, S.R., Clancy, C.E. and Harvey, R.D. (2016) Mechanisms restricting diffusion of intracellular cAMP. *Sci. Rep.* **6**, 19577, <https://doi.org/10.1038/srep19577>
- 40 Yang, P.-C., Boras, B.W., Jeng, M.-T., Docken, S.S., Lewis, T.J., McCulloch, A.D. et al. (2016) A computational modeling and simulation approach to investigate mechanisms of subcellular cAMP compartmentation. *PLoS Comput. Biol.* **12**, e1005005, <https://doi.org/10.1371/journal.pcbi.1005005>
- 41 Koschinski, A. and Zaccolo, M. (2017) Activation of PKA in cell requires higher concentration of cAMP than in vitro: implications for compartmentalization of cAMP signaling. *Sci. Rep.* **7**, 14090, <https://doi.org/10.1038/s41598-017-13021-y>
- 42 Walker-Gray, R., Stengel, F. and Gold, M.G. (2017) Mechanisms for restraining cAMP-dependent protein kinase revealed by subunit quantitation and cross-linking approaches. *Proc. Natl. Acad. Sci. U.S.A.* **114**, 10414–10419, <https://doi.org/10.1073/pnas.1701782114>
- 43 Zhang, J.Z., Lu, T.-W., Stolerman, L.M., Tenner, B., Yang, J.R., Zhang, J.-F. et al. (2020) Phase separation of a PKA regulatory subunit controls cAMP compartmentation and oncogenic signaling. *Cell* **182**, 1531.e15–1544.e15, <https://doi.org/10.1016/j.cell.2020.07.043>

- 44 Alberti, S., Gladfelter, A. and Mittag, T. (2019) Considerations and challenges in studying liquid-liquid phase separation and biomolecular condensates. *Cell* **176**, 419–434, <https://doi.org/10.1016/j.cell.2018.12.035>
- 45 Taylor, S.S., Zhang, P., Steichen, J.M., Keshwani, M.M. and Kornev, A.P. (2013) PKA: lessons learned after twenty years. *Biochim. Biophys. Acta* **1834**, 1271–1278, <https://doi.org/10.1016/j.bbapap.2013.03.007>
- 46 Yang, W., Robichaux, W.G., Mei, F.C., Lin, W., Li, L., Pan, S. et al. (2022) Epac1 activation by cAMP regulates cellular SUMOylation and promotes the formation of biomolecular condensates. *eabm2960*, <https://doi.org/10.1126/sciadv.abm2960>
- 47 Jaski, B.E., Fifer, M.A., Wright, R.F., Braunwald, E. and Colucci, W.S. (1985) Positive inotropic and vasodilator actions of milrinone in patients with severe congestive heart failure. Dose-response relationships and comparison to nitroprusside. *J. Clin. Invest.* **75**, 643–649, <https://doi.org/10.1172/JCI111742>
- 48 Packer, M., Carver, J.R., Rodeheffer, R.J., Ivanhoe, R.J., DiBianco, R., Zeldis, S.M. et al. (1991) Effect of oral milrinone on mortality in severe chronic heart failure. The PROMISE Study Research Group. *N. Engl. J. Med.* **325**, 1468–1475, <https://doi.org/10.1056/NEJM199111213252103>
- 49 Amsellem, E., Kasparian, C., Haddour, G., Boissel, J.P. and Nony, P. (2005) Phosphodiesterase III inhibitors for heart failure. The Cochrane database of systematic reviews. **2013** (1) CD002230-CD
- 50 Movsesian, M., Ahmad, F. and Hirsch, E. (2018) Functions of PDE3 isoforms in cardiac muscle. *J. Cardiovasc. Dev. Dis.* **5**, 10, <https://doi.org/10.3390/jcdd5010010>
- 51 Laude, A.J. and Simpson, A.W.M. (2009) Compartmentalized signaling: Ca<sup>2+</sup> compartments, microdomains and the many facets of Ca<sup>2+</sup> signaling. *FEBS J.* **276**, 1800–1816, <https://doi.org/10.1111/j.1742-4658.2009.06927.x>
- 52 Bootman, M.D., Berridge, M.J. and Lipp, P. (1997) Cooking with calcium: the recipes for composing global signals from elementary events. *Cell* **91**, 367–373, [https://doi.org/10.1016/S0092-8674\(00\)80420-1](https://doi.org/10.1016/S0092-8674(00)80420-1)
- 53 Allbritton, N.L., Meyer, T. and Stryer, L. (1992) Range of messenger action of calcium ion and inositol 1,4,5-trisphosphate. *Science (New York, NY)* **258**, 1812–1815, <https://doi.org/10.1126/science.1465619>
- 54 De Jong, K.A. and Nikolaev, V.O. (2021) Multifaceted remodeling of cAMP microdomains driven by different aetiologies of heart failure. *FEBS J.* **288**, 6603–6622, <https://doi.org/10.1111/febs.15706>
- 55 Reinhardt, F., Beneke, K., Pavlidou, N.G., Conradi, L., Reichensperner, H., Hove-Madsen, L. et al. (2021) Abnormal calcium handling in atrial fibrillation is linked to changes in cyclic AMP dependent signaling. *Cells* **10**, 3042, <https://doi.org/10.3390/cells10113042>
- 56 Sutar, H., Lyon, A., Lumens, J., Schotten, U., Dobrev, D. and Heijman, J. (2020) Cardiomyocyte calcium handling in health and disease: Insights from in vitro and in silico studies. *Prog. Biophys. Mol. Biol.* **157**, 54–75, <https://doi.org/10.1016/j.pbiomolbio.2020.02.008>
- 57 Hulme, J.T., Lin, T.W., Westenbroek, R.E., Scheuer, T. and Catterall, W.A. (2003) Beta-adrenergic regulation requires direct anchoring of PKA to cardiac CaV1.2 channels via a leucine zipper interaction with A kinase-anchoring protein 15. *PNAS* **100**, 13093–13098, <https://doi.org/10.1073/pnas.2135335100>
- 58 Jones, B.W., Deem, J., Younts, T.J., Weisenhaus, M., Sanford, C.A., Slack, M.C. et al. (2016) Targeted deletion of AKAP7 in dentate granule cells impairs spatial discrimination. *Elife* **5**, e20695, <https://doi.org/10.7554/eLife.20695>
- 59 Hulme, J.T., Westenbroek, R.E., Scheuer, T. and Catterall, W.A. (2006) Phosphorylation of serine 1928 in the distal C-terminal domain of cardiac CaV1.2 channels during beta1-adrenergic regulation. *PNAS* **103**, 16574–16579, <https://doi.org/10.1073/pnas.0607294103>
- 60 Bers, D.M. (2008) Calcium cycling and signaling in cardiac myocytes. *Annu. Rev. Physiol.* **70**, 23–49, <https://doi.org/10.1146/annurev.physiol.70.113006.100455>
- 61 Papa, A., Kushner, J., Hennessey, J.A., Katchman, A.N., Zakharov, S.I., Chen, B.-x. et al. (2021) Adrenergic CaV1.2 activation via rad phosphorylation converges at  $\alpha$ 1C I-II loop. *Circ. Res.* **128**, 76–88, <https://doi.org/10.1161/CIRCRESAHA.120.317839>
- 62 Katz, M., Subramaniam, S., Chomsky-Hecht, O., Tsemakhovich, V., Flockerzi, V., Klusmann, E. et al. (2021) Reconstitution of  $\beta$ -adrenergic regulation of CaV1.2: Rad-dependent and Rad-independent protein kinase A mechanisms. *Proc. Natl. Acad. Sci. U.S.A.* **118**, e2100021118, <https://doi.org/10.1073/pnas.2100021118>
- 63 Papa, A., Zakharov, S.I., Katchman, A.N., Kushner, J.S., Chen, B.-x., Yang, L. et al. (2022) Rad regulation of CaV1.2 channels controls cardiac fight-or-flight response. *Nat. Cardiovasc. Res.* **1**, 1022–1038, <https://doi.org/10.1038/s44161-022-00157-y>
- 64 Liu, G., Papa, A., Katchman, A.N., Zakharov, S.I., Roybal, D., Hennessey, J.A. et al. (2020) Mechanism of adrenergic CaV1.2 stimulation revealed by proximity proteomics. *Nature* **577**, 695–700, <https://doi.org/10.1038/s41586-020-1947-z>
- 65 Leroy, J., Abi-Gerges, A., Nikolaev, V.O., Richter, W., Lechêne, P., Mazet, J.L. et al. (2008) Spatiotemporal dynamics of beta-adrenergic cAMP signals and L-type Ca<sup>2+</sup> channel regulation in adult rat ventricular myocytes: role of phosphodiesterases. *Circ. Res.* **102**, 1091–1100, <https://doi.org/10.1161/CIRCRESAHA.107.167817>
- 66 Redden, J.M. and Dodge-Kafka, K.L. (2011) AKAP phosphatase complexes in the heart. *J. Cardiovasc. Pharmacol.* **58**, 354–362, <https://doi.org/10.1097/FJC.0b013e31821e5649>
- 67 Perera, R.K., Sprenger, J.U., Steinbrecher, J.H., Hübscher, D., Lehnart, S.E., Abesser, M. et al. (2015) Microdomain switch of cGMP-regulated phosphodiesterases leads to ANP-induced augmentation of  $\beta$ -adrenoceptor-stimulated contractility in early cardiac hypertrophy. *Circ. Res.* **116**, 1304–1311, <https://doi.org/10.1161/CIRCRESAHA.116.306082>
- 68 Muller, G.K., Song, J., Jani, V., Wu, Y., Liu, T., Jeffreys, W.P.D. et al. (2021) PDE1 inhibition modulates Cav1.2 channel to stimulate cardiomyocyte contraction. *Circ. Res.* **129**, 872–886, <https://doi.org/10.1161/CIRCRESAHA.121.319828>
- 69 Zhao, M., Wang, Y., Shi, Q., Xu, B. and Xiang, Y.K. (2020) SAP97 mediates local control of cAMP/PKA gradient to regulate L-type calcium channels in hearts. *FASEB J.* **34**, 1–1, <https://doi.org/10.1096/fasebj.2020.34.s1.06731>
- 70 Nichols, C.B., Rossow, C.F., Navedo, M.F., Westenbroek, R.E., Catterall, W.A., Santana, L.F. et al. (2010) Sympathetic stimulation of adult cardiomyocytes requires association of AKAP5 with a subpopulation of L-type calcium channels. *Circ. Res.* **107**, 747–756, <https://doi.org/10.1161/CIRCRESAHA.109.216127>

- 71 Sabourin, J., Robin, E. and Raddatz, E. (2011) A key role of TRPC channels in the regulation of electromechanical activity of the developing heart. *Cardiovasc. Res.* **92**, 226–236, <https://doi.org/10.1093/cvr/cvr167>
- 72 Zhang, Y., Knight, W., Chen, S., Mohan, A. and Yan, C. (2018) Multiprotein complex with TRPC (Transient Receptor Potential-Canonical) channel, PDE1C (Phosphodiesterase 1C), and A2R (Adenosine A2 Receptor) plays a critical role in regulating cardiomyocyte cAMP and survival. *Circulation* **138**, 1988–2002, <https://doi.org/10.1161/CIRCULATIONAHA.118.034189>
- 73 Lygren, B., Carlson, C.R., Santamaria, K., Lissandron, V., McSorley, T., Litzenberg, J. et al. (2007) AKAP complex regulates Ca<sup>2+</sup> re-uptake into heart sarcoplasmic reticulum. *EMBO Rep.* **8**, 1061–1067, <https://doi.org/10.1038/sj.embor.7401081>
- 74 Carlson, C.R., Aronsen, J.M., Bergan-Dahl, A., Moutty, M.C., Lunde, M., Lunde, P.K. et al. (2022) AKAP18 $\delta$  anchors and regulates CaMKII activity at phospholamban-SERCA2 and RYR. *Circ. Res.* **130**, 27–44, <https://doi.org/10.1161/CIRCRESAHA.120.317976>
- 75 Beca, S., Helli, P.B., Simpson, J.A., Zhao, D., Farman, G.P., Jones, P. et al. (2011) Phosphodiesterase 4D regulates baseline sarcoplasmic reticulum Ca<sup>2+</sup> release and cardiac contractility, independently of L-type Ca<sup>2+</sup> current. *Circ. Res.* **109**, 1024–1030, <https://doi.org/10.1161/CIRCRESAHA.111.250464>
- 76 Beca, S., Ahmad, F., Shen, W., Liu, J., Makary, S., Polidovitch, N. et al. (2013) Phosphodiesterase type 3A regulates basal myocardial contractility through interacting with sarcoplasmic reticulum calcium ATPase type 2a signaling complexes in mouse heart. *Circ. Res.* **112**, 289–297, <https://doi.org/10.1161/CIRCRESAHA.111.300003>
- 77 Lygren, B., Carlson, C.R., Santamaria, K., Lissandron, V., McSorley, T., Litzenberg, J. et al. (2007) AKAP complex regulates Ca<sup>2+</sup> re-uptake into heart sarcoplasmic reticulum. *EMBO Rep.* **8**, 1061–1067, <https://doi.org/10.1038/sj.embor.7401081>
- 78 Marx, S.O., Reiken, S., Hisamatsu, Y., Jayaraman, T., Burkoff, D., Rosembly, N. et al. (2000) PKA phosphorylation dissociates FKBP12.6 from the calcium release channel (ryanodine receptor): defective regulation in failing hearts. *Cell* **101**, 365–376, [https://doi.org/10.1016/S0092-8674\(00\)80847-8](https://doi.org/10.1016/S0092-8674(00)80847-8)
- 79 Dodge, K.L., Khouangsathiene, S., Kapiloff, M.S., Mouton, R., Hill, E.V., Houslay, M.D. et al. (2001) mA KAP assembles a protein kinase A/PDE4 phosphodiesterase cAMP signaling module. *EMBO J.* **20**, 1921–1930, <https://doi.org/10.1093/emboj/20.8.1921>
- 80 Berisha, F., Götz, K.R., Wegener, J.W., Brandenburg, S., Subramanian, H., Molina, C.E. et al. (2021) cAMP imaging at ryanodine receptors reveals  $\beta$ 2-adrenoceptor driven arrhythmias. *Circ. Res.* **129**, 81–94, <https://doi.org/10.1161/CIRCRESAHA.120.318234>
- 81 Passariello, C.L., Li, J., Dodge-Kafka, K. and Kapiloff, M.S. (2015) mA KAP—a master scaffold for cardiac remodeling. *J. Cardiovasc. Pharmacol.* **65**, 218–225, <https://doi.org/10.1097/FJC.0000000000000206>
- 82 Dodge-Kafka, K.L., Gildart, M., Li, J., Thakur, H. and Kapiloff, M.S. (2018) Bidirectional regulation of HDAC5 by mA KAP $\beta$  signalosomes in cardiac myocytes. *J. Mol. Cell Cardiol.* **118**, 13–25, <https://doi.org/10.1016/j.yjmcc.2018.03.001>
- 83 Luo, M. and Anderson, M.E. (2013) Mechanisms of altered Ca<sup>2+</sup> handling in heart failure. *Circ. Res.* **113**, 690–708, <https://doi.org/10.1161/CIRCRESAHA.113.301651>
- 84 Brescia, M., Chao, Y.-C., Koschinski, A., Tomek, J. and Zaccolo, M. (2020) Multi-compartment, early disruption of cGMP and cAMP signaling in cardiac myocytes from the mdx model of duchenne muscular dystrophy. *Int. J. Mol. Sci.* **21**, 7056, <https://doi.org/10.3390/ijms21197056>
- 85 Kiuchi, K., Shannon, R.P., Komamura, K., Cohen, D.J., Bianchi, C., Homcy, C.J. et al. (1993) Myocardial beta-adrenergic receptor function during the development of pacing-induced heart failure. *J. Clin. Invest.* **91**, 907–914, <https://doi.org/10.1172/JCI116312>
- 86 Chen, L.A., Vatner, D.E., Vatner, S.F., Hittinger, L. and Homcy, C.J. (1991) Decreased Gs alpha mRNA levels accompany the fall in Gs and adenylyl cyclase activities in compensated left ventricular hypertrophy. In heart failure, only the impairment in adenylyl cyclase activation progresses. *J. Clin. Invest.* **87**, 293–298, <https://doi.org/10.1172/JCI114985>
- 87 Aye, T.T., Soni, S., van Veen, T.A., van der Heyden, M.A., Cappadona, S., Varro, A. et al. (2012) Reorganized PKA-AKAP associations in the failing human heart. *J. Mol. Cell Cardiol.* **52**, 511–518, <https://doi.org/10.1016/j.yjmcc.2011.06.003>
- 88 Abi-Gerges, A., Richter, W., Lefebvre, F., Mateo, P., Varin, A., Heymes, C. et al. (2009) Decreased expression and activity of cAMP phosphodiesterases in cardiac hypertrophy and its impact on beta-adrenergic cAMP signals. *Circ. Res.* **105**, 784–792, <https://doi.org/10.1161/CIRCRESAHA.109.197947>
- 89 Ding, B., Abe, J.I., Wei, H., Huang, Q., Walsh, R.A., Molina, C.A. et al. (2005) Functional role of phosphodiesterase 3 in cardiomyocyte apoptosis: implication in heart failure. *Circulation* **111**, 2469–2476, <https://doi.org/10.1161/01.CIR.0000165128.39715.87>
- 90 Mehel, H., Emons, J., Vettel, C., Wittköpper, K., Seppelt, D., Dewenter, M. et al. (2013) Phosphodiesterase-2 is up-regulated in human failing hearts and blunts  $\beta$ -adrenergic responses in cardiomyocytes. *J. Am. Coll. Cardiol.* **62**, 1596–1606, <https://doi.org/10.1016/j.jacc.2013.05.057>
- 91 Lehnart, S.E., Wehrens, X.H., Reiken, S., Warrier, S., Belevych, A.E., Harvey, R.D. et al. (2005) Phosphodiesterase 4D deficiency in the ryanodine-receptor complex promotes heart failure and arrhythmias. *Cell* **123**, 25–35, <https://doi.org/10.1016/j.cell.2005.07.030>
- 92 Benkuský, N.A., Weber, C.S., Scherman, J.A., Farrell, E.F., Hacker, T.A., John, M.C. et al. (2007) Intact  $\beta$ -adrenergic response and unmodified progression toward heart failure in mice with genetic ablation of a major protein kinase A phosphorylation site in the cardiac ryanodine receptor. *Circ. Res.* **101**, 819–829, <https://doi.org/10.1161/CIRCRESAHA.107.153007>
- 93 Sprenger, J.U., Perera, R.K., Steinbrecher, J.H., Lehnart, S.E., Maier, L.S., Hasenfuss, G. et al. (2015) In vivo model with targeted cAMP biosensor reveals changes in receptor–microdomain communication in cardiac disease. *Nat. Commun.* **6**, 6965, <https://doi.org/10.1038/ncomms7965>
- 94 Sanchez-Alonso, J.L., Loucks, A., Schobesberger, S., van Cromvoirt, A.M., Poulet, C., Chowdhury, R.A. et al. (2020) Nanoscale regulation of L-type calcium channels differentiates between ischemic and dilated cardiomyopathies. *EBioMedicine* **57**, 102845, <https://doi.org/10.1016/j.ebiom.2020.102845>
- 95 Levitan, B.M., Manning, J.R., Withers, C.N., Smith, J.D., Shaw, R.M., Andres, D.A. et al. (2016) Rad-deletion phenocopies tonic sympathetic stimulation of the heart. *J. Cardiovasc. Transl. Res.* **9**, 432–444, <https://doi.org/10.1007/s12265-016-9716-y>
- 96 Bauman, A.L., Michel, J.J., Henson, E., Dodge-Kafka, K.L. and Kapiloff, M.S. (2007) The mA KAP signalosome and cardiac myocyte hypertrophy. *IUBMB Life* **59**, 163–169, <https://doi.org/10.1080/15216540701358593>



- 97 Hulme, J.T., Ahn, M., Hauschka, S.D., Scheuer, T. and Catterall, W.A. (2002) A novel leucine zipper targets AKAP15 and cyclic AMP-dependent protein kinase to the C terminus of the skeletal muscle Ca<sup>2+</sup> channel and modulates its function. *J. Biol. Chem.* **277**, 4079–4087, <https://doi.org/10.1074/jbc.M109814200>
- 98 Murabito, A., Cnudde, S., Hirsch, E. and Ghigo, A. (2020) Potential therapeutic applications of AKAP disrupting peptides. *Clin. Sci.* **134**, 3259–3282, <https://doi.org/10.1042/CS20201244>
- 99 Gilotra, N.A., DeVore, A.D., Povsic, T.J., Hays, A.G., Hahn, V.S., Agunbiade, T.A. et al. (2021) Acute hemodynamic effects and tolerability of phosphodiesterase-1 inhibition with ITI-214 in human systolic heart failure. *Circulation Heart Failure* **14**, e008236, <https://doi.org/10.1161/CIRCHEARTFAILURE.120.008236>
- 100 Lin, B.L., Li, A., Mun, J.Y., Previs, M.J., Previs, S.B., Campbell, S.G. et al. (2018) Skeletal myosin binding protein-C isoforms regulate thin filament activity in a Ca(2+)-dependent manner. *Sci. Rep.* **8**, 2604, <https://doi.org/10.1038/s41598-018-21053-1>
- 101 Layland, J., Solaro, R.J. and Shah, A.M. (2005) Regulation of cardiac contractile function by troponin I phosphorylation. *Cardiovasc. Res.* **66**, 12–21, <https://doi.org/10.1016/j.cardiores.2004.12.022>
- 102 Streng, A.S., de Boer, D., van der Velden, J., van Dieijen-Visser, M.P. and Wodzig, W.K.W.H. (2013) Posttranslational modifications of cardiac troponin T: an overview. *J. Mol. Cell Cardiol.* **63**, 47–56, <https://doi.org/10.1016/j.yjmcc.2013.07.004>
- 103 Sumandea, C.A., Garcia-Cazarin, M.L., Bozio, C.H., Sievert, G.A., Balke, C.W. and Sumandea, M.P. (2011) Cardiac troponin T, a sarcomeric AKAP, tethers protein kinase A at the myofilaments. *J. Biol. Chem.* **286**, 530–541, <https://doi.org/10.1074/jbc.M110.148684>
- 104 Uys, G.M., Ramburan, A., Loos, B., Kinnear, C.J., Korkie, L.J., Mouton, J. et al. (2011) Myomegalin is a novel A-kinase anchoring protein involved in the phosphorylation of cardiac myosin binding protein C. *BMC Cell Biol.* **12**, 18, <https://doi.org/10.1186/1471-2121-12-18>
- 105 Abou Ziki, M.D., Bhat, N., Neogi, A., Driscoll, T.P., Ugwu, N., Liu, Y. et al. (2021) Epistatic interaction of PDE4DIP and DES mutations in familial atrial fibrillation with slow conduction. *Hum. Mutat.* **42**, 1279–1293, <https://doi.org/10.1002/humu.24265>
- 106 El-Armouche, A., Pohlmann, L., Schlossarek, S., Starbatty, J., Yeh, Y.-H., Nattel, S. et al. (2007) Decreased phosphorylation levels of cardiac myosin-binding protein-C in human and experimental heart failure. *J. Mol. Cell Cardiol.* **43**, 223–229, <https://doi.org/10.1016/j.yjmcc.2007.05.003>
- 107 Granzier, H.L. and Labeit, S. (2004) The giant protein titin. *Circ. Res.* **94**, 284–295, <https://doi.org/10.1161/01.RES.0000117769.88862.F8>
- 108 Fukuda, N., Wu, Y., Nair, P. and Granzier, H.L. (2005) Phosphorylation of titin modulates passive stiffness of cardiac muscle in a titin isoform-dependent manner. *J. Gen. Physiol.* **125**, 257–271, <https://doi.org/10.1085/jgp.200409177>
- 109 Russell, M.A. (2020) Synemin redefined: multiple binding partners results in multifunctionality. *Front. Cell Dev. Biol.* **8**, 159, <https://doi.org/10.3389/fcell.2020.00159>
- 110 Krysiak, J., Unger, A., Beckendorf, L., Hamdani, N., von Frieling-Salewsky, M., Redfield, M.M. et al. (2018) Protein phosphatase 5 regulates titin phosphorylation and function at a sarcomere-associated mechanosensor complex in cardiomyocytes. *Nat. Commun.* **9**, 262, <https://doi.org/10.1038/s41467-017-02483-3>
- 111 Kirchhefer, U., Schmitz, W., Scholz, H. and Neumann, J. (1999) Activity of cAMP-dependent protein kinase and Ca<sup>2+</sup>/calmodulin-dependent protein kinase in failing and nonfailing human hearts. *Cardiovasc. Res.* **42**, 254–261, [https://doi.org/10.1016/S0008-6363\(98\)00296-X](https://doi.org/10.1016/S0008-6363(98)00296-X)
- 112 Piddo, A.M., Sánchez, M.I., Sapag-Hagar, M., Corbalán, R., Foncea, R., Ebensperger, R. et al. (1996) Cyclic AMP-dependent protein kinase and mechanical heart function in ventricular hypertrophy induced by pressure overload or secondary to myocardial infarction. *J. Mol. Cell Cardiol.* **28**, 1073–1083, <https://doi.org/10.1006/jmcc.1996.0099>
- 113 Marston, S.B. and de Tombe, P.P. (2008) Troponin phosphorylation and myofilament Ca<sup>2+</sup>-sensitivity in heart failure: Increased or decreased? *J. Mol. Cell Cardiol.* **45**, 603–607, <https://doi.org/10.1016/j.yjmcc.2008.07.004>
- 114 Barbagallo, F., Xu, B., Reddy, G.R., West, T., Wang, Q., Fu, Q. et al. (2016) Genetically encoded biosensors reveal PKA hyperphosphorylation on the myofilaments in rabbit heart failure. *Circ. Res.* **119**, 931–943, <https://doi.org/10.1161/CIRCRESAHA.116.308964>
- 115 Dai, Y., Amenov, A., Ignatyeva, N., Koschinski, A., Xu, H., Soong, P.L. et al. (2020) Troponin destabilization impairs sarcomere-cytoskeleton interactions in iPSC-derived cardiomyocytes from dilated cardiomyopathy patients. *Sci. Rep.* **10**, 209, <https://doi.org/10.1038/s41598-019-56597-3>
- 116 Koser, F., Loescher, C. and Linke, W.A. (2019) Posttranslational modifications of titin from cardiac muscle: how, where, and what for? *FEBS J.* **286**, 2240–2260, <https://doi.org/10.1111/febs.14854>
- 117 Hamdani, N., Bishu, K.G., von Frieling-Salewsky, M., Redfield, M.M. and Linke, W.A. (2013) Deranged myofilament phosphorylation and function in experimental heart failure with preserved ejection fraction. *Cardiovasc. Res.* **97**, 464–471, <https://doi.org/10.1093/cvr/cvs353>
- 118 Mayr, B. and Montminy, M. (2001) Transcriptional regulation by the phosphorylation-dependent factor CREB. *Nat. Rev. Mol. Cell Biol.* **2**, 599–609, <https://doi.org/10.1038/35085068>
- 119 Sun, L., Zhao, R., Zhang, L., Zhang, W., He, G., Yang, S. et al. (2016) Prevention of vascular smooth muscle cell proliferation and injury-induced neointimal hyperplasia by CREB-mediated p21 induction: An insight from a plant polyphenol. *Biochem. Pharmacol.* **103**, 40–52, <https://doi.org/10.1016/j.bcp.2016.01.015>
- 120 Wang, H., Xu, J., Lazarovici, P., Quirion, R. and Zheng, W. (2018) cAMP response element-binding protein (CREB): a possible signaling molecule link in the pathophysiology of schizophrenia. *Front. Mol. Neurosci.* **11**, 255, <https://doi.org/10.3389/fnmol.2018.00255>
- 121 Clister, T., Greenwald, E.C., Baillie, G.S. and Zhang, J. (2019) AKAP95 organizes a nuclear microdomain to control local cAMP for regulating nuclear PKA. *Cell Chem. Biol.* **26**, 885.e4–891.e4, <https://doi.org/10.1016/j.chembiol.2019.03.003>
- 122 Wadzinski, B.E., Wheat, W.H., Jaspers, S., Peruski, L.F., Lickteig, R.L., Johnson, G.L. et al. (1993) Nuclear protein phosphatase 2A dephosphorylates protein kinase A-phosphorylated CREB and regulates CREB transcriptional stimulation. *Mol. Cell. Biol.* **13**, 2822–2834
- 123 Khalilimeybodi, A., Daneshmehr, A. and Sharif-Kashani, B. (2018) Investigating  $\beta$ -adrenergic-induced cardiac hypertrophy through computational approach: classical and non-classical pathways. *J. Physiol. Sci.* **68**, 503–520, <https://doi.org/10.1007/s12576-017-0557-5>
- 124 Zippin, J.H., Farrell, J., Huron, D., Kamenetsky, M., Hess, K.C., Fischman, D.A. et al. (2004) Bicarbonate-responsive “soluble” adenylyl cyclase defines a nuclear cAMP microdomain. *J. Cell Biol.* **164**, 527–534, <https://doi.org/10.1083/jcb.200311119>



- 125 Wong, W., Goehring, A.S., Kapiloff, M.S., Langeberg, L.K. and Scott, J.D. (2008) mAKAP compartmentalizes oxygen-dependent control of HIF-1 $\alpha$ . *Sci. Signal.* **1**, ra18, <https://doi.org/10.1126/scisignal.2000026>
- 126 Vargas, M.A., Tirnauer, J.S., Glidden, N., Kapiloff, M.S. and Dodge-Kafka, K.L. (2012) Myocyte enhancer factor 2 (MEF2) tethering to muscle selective A-kinase anchoring protein (mAKAP) is necessary for myogenic differentiation. *Cell. Signal.* **24**, 1496–1503, <https://doi.org/10.1016/j.cellsig.2012.03.017>
- 127 Li, J., Kritzer, M., Michel, J., Le, A., Thakur, H., Gayanilo, M. et al. (2012) Anchored p90 ribosomal S6 kinase 3 is required for cardiac myocyte hypertrophy. *Circ. Res.* **112**, 128–39
- 128 Dodge-Kafka, K., Gildart, M., Tokarski, K. and Kapiloff, M.S. (2019) mAKAP $\beta$  signalosomes – a nodal regulator of gene transcription associated with pathological cardiac remodeling. *Cell. Signal.* **63**, 109357, <https://doi.org/10.1016/j.cellsig.2019.109357>
- 129 Dodge-Kafka, K.L., Bauman, A., Mayer, N., Henson, E., Heredia, L., Ahn, J. et al. (2010) cAMP-stimulated protein phosphatase 2A activity associated with muscle A kinase-anchoring protein (mAKAP) signaling complexes inhibits the phosphorylation and activity of the cAMP-specific phosphodiesterase PDE4D3. *J. Biol. Chem.* **285**, 11078–11086, <https://doi.org/10.1074/jbc.M109.034868>
- 130 Dodge-Kafka, K.L., Souhayer, J., Pare, G.C., Carlisle Michel, J.J., Langeberg, L.K., Kapiloff, M.S. et al. (2005) The protein kinase A anchoring protein mAKAP coordinates two integrated cAMP effector pathways. *Nature* **437**, 574–578, <https://doi.org/10.1038/nature03966>
- 131 Ha, C.H., Kim, J.Y., Zhao, J., Wang, W., Jhun, B.S., Wong, C. et al. (2010) PKA phosphorylates histone deacetylase 5 and prevents its nuclear export, leading to the inhibition of gene transcription and cardiomyocyte hypertrophy. *Proc. Natl. Acad. Sci. U.S.A.* **107**, 15467–15472, <https://doi.org/10.1073/pnas.1000462107>
- 132 Zhao, G., Aghakeshmiri, S., Chen, Y.T., Zhang, H.M., Yip, F. and Yang, D. (2021) NFAT5-mediated signaling pathways in viral infection and cardiovascular dysfunction. *Int. J. Mol. Sci.* **22**, 4872
- 133 Watson, P.A., Birdsey, N., Huggins, G.S., Svensson, E., Heppe, D. and Knaub, L. (2010) Cardiac-specific overexpression of dominant-negative CREB leads to increased mortality and mitochondrial dysfunction in female mice. *Am. J. Physiol.-Heart Circ. Physiol.* **299**, H2056–H2068, <https://doi.org/10.1152/ajpheart.00394.2010>
- 134 Fentzke, R.C., Korcarz, C.E., Lang, R.M., Lin, H. and Leiden, J.M. (1998) Dilated cardiomyopathy in transgenic mice expressing a dominant-negative CREB transcription factor in the heart. *J. Clin. Invest.* **101**, 2415–2426, <https://doi.org/10.1172/JCI2950>
- 135 Schulte, J.S., Seidl, M.D., Nunes, F., Freese, C., Schneider, M., Schmitz, W. et al. (2012) CREB critically regulates action potential shape and duration in the adult mouse ventricle. *Am. J. Physiol. Heart Circ. Physiol.* **302**, H1998–H2007, <https://doi.org/10.1152/ajpheart.00057.2011>
- 136 Watson, P.A., Reusch, J.E.B., McCune, S.A., Leinwand, L.A., Luckey, S.W., Konhilas, J.P. et al. (2007) Restoration of CREB function is linked to completion and stabilization of adaptive cardiac hypertrophy in response to exercise. *Am. J. Physiol.-Heart Circ. Physiol.* **293**, H246–H259, <https://doi.org/10.1152/ajpheart.00734.2006>
- 137 Yin, P., Li, D., Zhao, Q., Cai, M., Wu, Z., Shi, Y. et al. (2021) Gs $\alpha$  deficiency facilitates cardiac remodeling via CREB/ Bmp10-mediated signaling. *Cell Death Discov.* **7**, 391, <https://doi.org/10.1038/s41420-021-00788-3>
- 138 Zhang, L., Malik, S., Pang, J., Wang, H., Park Keigan, M., Yule David, I. et al. (2013) Phospholipase C $\epsilon$  hydrolyzes perinuclear phosphatidylinositol 4-phosphate to regulate cardiac hypertrophy. *Cell* **153**, 216–227, <https://doi.org/10.1016/j.cell.2013.02.047>
- 139 Nash, C.A., Brown, L.M., Malik, S., Cheng, X. and Smrcka, A.V. (2018) Compartmentalized cyclic nucleotides have opposing effects on regulation of hypertrophic phospholipase C $\epsilon$  signaling in cardiac myocytes. *J. Mol. Cell Cardiol.* **121**, 51–59, <https://doi.org/10.1016/j.jmcc.2018.06.002>
- 140 Wang, L., Burmeister, B.T., Johnson, K.R., Baillie, G.S., Karginov, A.V., Skidgel, R.A. et al. (2015) UCR1C is a novel activator of phosphodiesterase 4 (PDE4) long isoforms and attenuates cardiomyocyte hypertrophy. *Cell. Signal.* **27**, 908–922, <https://doi.org/10.1016/j.cellsig.2015.02.003>
- 141 Omar, F., Findlay, J.E., Carfray, G., Allcock, R.W., Jiang, Z., Moore, C. et al. (2019) Small-molecule allosteric activators of PDE4 long form cyclic AMP phosphodiesterases. *PNAS* **116**, 13320–13329, <https://doi.org/10.1073/pnas.1822113116>
- 142 Pérez López, I., Cariolato, L., Maric, D., Gillet, L., Abriel, H. and Diviani, D. (2013) A-kinase anchoring protein Lbc coordinates a p38 activating signaling complex controlling compensatory cardiac hypertrophy. *Mol. Cell. Biol.* **33**, 2903–2917, <https://doi.org/10.1128/MCB.00031-13>
- 143 Li, J., Vargas, M.A.X., Kapiloff, M.S. and Dodge-Kafka, K.L. (2013) Regulation of MEF2 transcriptional activity by calcineurin/mAKAP complexes. *Exp. Cell Res.* **319**, 447–454, <https://doi.org/10.1016/j.yexcr.2012.12.016>
- 144 Schleicher, K. and Zaccolo, M. (2020) Defining a cellular map of cAMP nanodomains. *Mol. Pharmacol.* **99**, 383–391, [mol.119.118869](https://doi.org/10.1111/118869)
- 145 McCabe, K.J. and Rangamani, P. (2021) Computational modeling approaches to cAMP/PKA signaling in cardiomyocytes. *J. Mol. Cell Cardiol.* **154**, 32–40, <https://doi.org/10.1016/j.jmcc.2021.01.008>
- 146 Doste, R. and Bueno-Orovio, A. (2021) Multiscale modelling of  $\beta$ -adrenergic stimulation in cardiac electromechanical function. *Mathematics* **9**, 1785, <https://doi.org/10.3390/math9151785>
- 147 Asfaw, T.N., Tyan, L., Glukhov, A.V. and Bondarenko, V.E. (2020) A compartmentalized mathematical model of mouse atrial myocytes. *Am. J. Physiol.-Heart Circ. Physiol.* **318**, H485–H507, <https://doi.org/10.1152/ajpheart.00460.2019>
- 148 Tanwar, M., Kateriya, S., Nair, D. and Jose, M. (2021) Optogenetic modulation of real-time nanoscale dynamics of HCN channels using photoactivated adenylyl cyclases. *RSC Chem. Biol.* **2**, 863–875, <https://doi.org/10.1039/D0CB00124D>
